# Supplementary material for: Last interglacial sea-level proxies in the Korean Peninsula
Source: Copernicus journal article supplement (doi:10.5194/essd-2021-205), 2021-07-01
Supplement: Supplementary file [file essd-2021-205-AC1-supplement.pdf]

## Authors' response to anonymous referee's comments:

We are so grateful for the anonymous referee's comments. They carefully reviewed our manuscript and provided constructive and helpful comments. The followings are in response to their comments in sequence. The blue font indicates newly added or corrected sentences in the revised manuscript.

### Main discussion and comments:

#### 1. One scientific issue:

The reviewers are correct that there are some sea-level indicators (SLI) and terrestrial limiting records (TL) reaching over +5 m. Specifically, we have 3 SLI at Wando-Sinji 3 (WALIS LUM ID #464: +6.1 m), and Sacheon-Daepodong (WALIS LUM ID #460: +6 m; #461: +6 m) in the western and southern areas (Table 3 and Figs. 2 and 7). We also have the lowest TL of Haenam-Ijin-ri 3 (WALIS LUM ID #467: +5.4 m) and the lowest SLI of Wando-Sinji 1 (WALIS LUM ID #462: +2.8 m) in the western areas. In the eastern area, we didn't consider LIG sea-level elevation data because of neotectonic uplift since MIS 5e. To address this comment, we changed the text to suggest MIS 5e sea levels lie between +3 and +6 m in the revised manuscript, strictly based on the SLI and TL data, discarding our previous intuitive height of 2 to 5 m.

#### 2. Revising some figures and figure captions:

We revised all figures and figure captions that they had commented on. The following provides our responses to their specific comments.

### Specific comments:

#### 3. Figures 2 and 7:

We used an inverted triangle legend for the terrestrial-limit site. The following sentences were added in the figure caption: Red circles represent sea-level indicator locations based on OSL ages with exception of the Pohang-Masan-ri area which has an additional paleomagnetic-based age. An inverted triangle shows the location of a terrestrial-limiting point. Age data can be found in Table 3. Bathymetric contour interval is in meters.

In Figure 7, the following sentence was added in the figure caption: A red circle represents the location of sea-level indicator while blue triangles and brown inverted triangles represent marine-limiting and terrestrial-limiting site locations, respectively. Age data can be found in Table 3. Bathymetric contour interval is in meters.

The subsite names of sample sites were added in the revised Figure 2, which accords to those in Table 3 and the open-access spreadsheet (Ryang and Simms, 2021).

4. Figure 3:

We corrected Geumgok-ri 1105 GG to Geumgok-ri 1 and 2 in Figure 3, which accords in the subsite name in Table 3 and the open-access spreadsheet (Ryang and Simms, 2021).

5. Figure 4:

A sentence was added in the figure caption as follows: **Two ages in red indicate LIG ages (WALIS LUM ID #449 and #450 in Table 3).**

6. Line 221 and 222:

The sentence was rewritten as it follows: **where  $U_1$  represents the upper limit of the modern analog landform's elevation,  $L_1$  represents the lower limit of the modern analog landform's elevation, SWSH represents storm wave swash height, and  $d_b$  represents the breaking depth. Each of these values was obtained from local sources (Table 1).**

In addition, the sentence in Line 219 was rewritten as it follows: **Where  $E$  represents the elevation of the sea-level indicator,  $RWL$  represents the reference water level, and  $\delta_{RSL}$  accounts for the uncertainties in the paleo RSL (Rovere et al., 2016).**

7. Line 283:

We put all subsite names in Table 3 on Figures 2 and 7 as a set of the site and subsite names.

8. Line 298, 308, 315, 324-325, 333, 337, 345, 360, 365, 374, 381, 388-389:

Same responses for Line 283.

9. Line 397:

Same responses for Line 283 and we corrected the box name in the western area on Figure 1.

10. Line 409:

Same responses for Line 283.

11. Figure 11:

(1) A sentence was added in the figure caption as follows: **Orange shading highlights the correlation of LIG deposits across the 6 coastal cores and Wando outcrop sections..**

(2) We changed 'West' and 'East' to 'Seaward' and 'Landward', respectively.

(3) We changed 'WD1 & SJ' and 'Wando-Sinji 1 and 3', which accords in the subsite name in Table 3, Figure 7, and the open-access spreadsheet (Ryang and Simms, 2021).

(4) A sentence was added in the figure caption as follows: [Ages in red indicate LIG ages \(WALIS LUM ID #470 to #491 in Table 3\)](#).

12. Line 621:

Same responses for '1. One scientific issue' in the upper Main discussion and comments.
