# Supplementary material for: Last interglacial sea-level proxies in the Korean Peninsula
Source: Copernicus journal article supplement (doi:10.5194/essd-2021-205), 2021-07-01
Supplement: Supplementary file [file essd-2021-205-AC4-supplement.pdf]

# Last interglacial sea-level proxies in the Korean Peninsula

Woo Hun Ryang<sup>1</sup>, Alexander R. Simms<sup>2</sup>, Hyun Ho Yoon<sup>3</sup>, Seung Soo Chun<sup>4</sup>, and Gee Soo Kong<sup>5</sup>

<sup>1</sup> Division of Science Education and Institute of Science Education, Jeonbuk National University, Jeonju, Jeonbuk 54896, Republic of Korea

5 <sup>2</sup> Department of Earth Science, University of California, Santa Barbara, California 93106, U.S.A.

<sup>3</sup> Geological Research Division, Korea Institute of Geoscience and Mineral Resources (KIGAM), Daejeon 34132, Republic of Korea

<sup>4</sup> Faculty of Earth System & Environmental Sciences, Chonnam National University, Gwangju 61186, Republic of Korea

10 <sup>5</sup> Petroleum and Marine Research Division, Korea Institute of Geoscience and Mineral Resources (KIGAM), Daejeon 34132, Republic of Korea

*Correspondence to:* Woo Hun Ryang ([ryang@jbnu.ac.kr](mailto:ryang@jbnu.ac.kr))

**Abstract.** Like most of the world's coastlines, the Korean Peninsula experienced higher-than-present sea levels during the Last Interglacial (LIG) otherwise known as Marine Isotope Stage (MIS) 5e. However, the expression of that highstand in **the geological record** differs across the eastern and western Korean Peninsula. The **tectonically** active east coast of the Korean Peninsula is characterized by broad uplifted marine terraces, while the stable west coast is characterized by tidal flats and rias. In this study, we used a standardized database template to review and extract the existing constraints on LIG sea levels along both the east and west coasts of the Korean Peninsula. A total of 62 LIG constraining data points were compiled including 34 sea-level indicators, 22 marine limiting records, and 6 terrestrial limiting records. The ages from these data points are based on 61 optically stimulated luminescence (OSL) measurements and 1 paleomagnetic-based age. Along the uplifted east coast, LIG sea-level indicators based on marine terraces are at elevations ranging from +9 to +32 m. The uplifted marine terraces are cut or otherwise deformed by faults developed under a compressional regime due to backarc closing of the East Sea since the early Pliocene. As a result, tectonic uplift likely **has affected** the elevations of the east coast LIG shorelines. **In contrast**, LIG sea-level **records** on the west coast of the Korean Peninsula are found at heights of between **+3 and +6 m** and include marine and terrestrial **elevation**-limiting records as well as true sea-level indicators. The LIG sea-level constraints along the west coast of the Korean Peninsula are likely **unaffected** by vertical movement or experienced minor subsidence during the Quaternary.

## 1 Introduction

During the Last Interglacial (LIG), otherwise known as Marine Isotope Stage (MIS) 5e (about 130 to 115 ka), global sea level was 5~9 m higher than present sea level (**Veeh, 1966**; Dutton and Lambeck, 2012). However, the **apparent** magnitude of that highstand is expressed differently across the globe depending on local tectonics, glacial-isostatic adjustment (GIA) **processes**, and **sediment** compaction. Due to their **contrasting** tectonic settings, the eastern and western coasts of the Korean Peninsula

record that global highstand in sea levels differently. The eastern Korean Peninsula is tectonically active while the western Korean Peninsula has been relatively stable throughout the Quaternary (Chough et al., 2000; Chough, 2013). As a result, the active east coast of the Korean Peninsula is characterized by broad uplifted marine terraces (S.J. Choi, 2019; G.Y. Lee and Park, 2019b), while the more stable west coast hosts tidal environments of its ria coast (Chough et al., 2004; Cummings et al., 2016). Available LIG constraints from the east coast are based primarily on raised beach deposits overlying marine terraces, while those of the west coast are based on both presently submerged and subaerial tidal deposits. Although marine terraces are more prominent with a higher potential of preserving coastal indicators reflecting higher sea levels (Shennan et al., 2015; Rovere et al., 2016), sea-level records based on tidal deposit along the west coast **actually** may provide more valuable MIS 5e sea-level records. The value of the sea level indicators of the western Korean Peninsula is in part due to relatively minor glacial isostatic adjustment (GIA) effects across the Korean Peninsula (Creveling et al., 2017) and tectonic stability (Chough et al., 2000; Chough, 2013). In this paper, we summarize **the** two contrasting datasets of MIS5e relative sea-level (RSL) changes from the two different tectonic settings of the eastern and western Korean Peninsula.

This work is part of the World Atlas of Last Interglacial Shorelines (WALIS) whose aim is to construct a database of LIG RSL indicators from across the globe (<https://warmcoasts.eu/world-atlas.html>). This paper reviews the LIG sea-level constraints from the Korean Peninsula entered into the online WALIS database (zenodo). A total of 75 papers including 68 published and 7 unpublished studies were reviewed to extract 62 LIG data points comprising 34 sea-level indicators, 22 marine limiting records, and 6 terrestrial limiting records. These data are based on 61 optically stimulated luminescence (OSL) ages and 1 paleomagnetic-constraint. The database for the Korean Peninsula is available open-access in spreadsheet format as Ryang and Simms (2021), at the link: <https://doi.org/10.5281/zenodo.4974826>. A description of the database fields is available from Rovere et al. (2020) at this link: <https://doi.org/10.5281/zenodo.3961543>. The following sections provide an overview of the geological and oceanographic setting of the Korean Peninsula, a history of the geological research conducted on the marine late Pleistocene deposits of the area, and an explanation of the sea-level constraints included in the database.

## 2 Background

### 2.1 Geological and Oceanographic overview

The tectonic framework of the Korean Peninsula reflects the large-scale interaction between the Pacific, Eurasian, and Indian plates during the Cenozoic. Two major tectonic processes govern that framework: northwestward subduction of the Pacific Plate beneath the eastern margin of the Eurasia Plate and eastward extrusion of continental crust due to the India-Eurasia collision (Molnar and Tapponnier, 1975; Watson et al., 1987; Schellart and Lister, 2005).

The East Sea (Sea of Japan) is a backarc basin on the eastern margin of the Eurasia Plate, which opened and subsided during the early Oligocene through middle Miocene (32 to 10 Ma) (Fig. 1; Ingle, 1992; Tamaki et al., 1992; Chough et al., 2000). Since the early Pliocene (5 Ma), the **region** has experienced backarc closing resulting in compressional deformation (S.H. Yoon and Chough, 1995; Kwon et al., 2009). The compressional deformation caused uplift of the eastern Korean continental

margin throughout the Quaternary (Fig. 2; Chough et al., 2000). Uplift resulted in the development of Quaternary marine terraces along the eastern shoreline of the Korean Peninsula (Figs. 3 to 6). The marine terraces are grouped into 4 to 6 sets on the basis of their elevation, ranging from 3 to 130 m above present sea level (S.W. Kim, 1973; Oh, 1977; D.Y. Lee, 1987). Individual terraces are overlain by 2-40 m of unconsolidated **marine and aeolian** sands and well-rounded **beach** gravels (Chough et al., 2000).

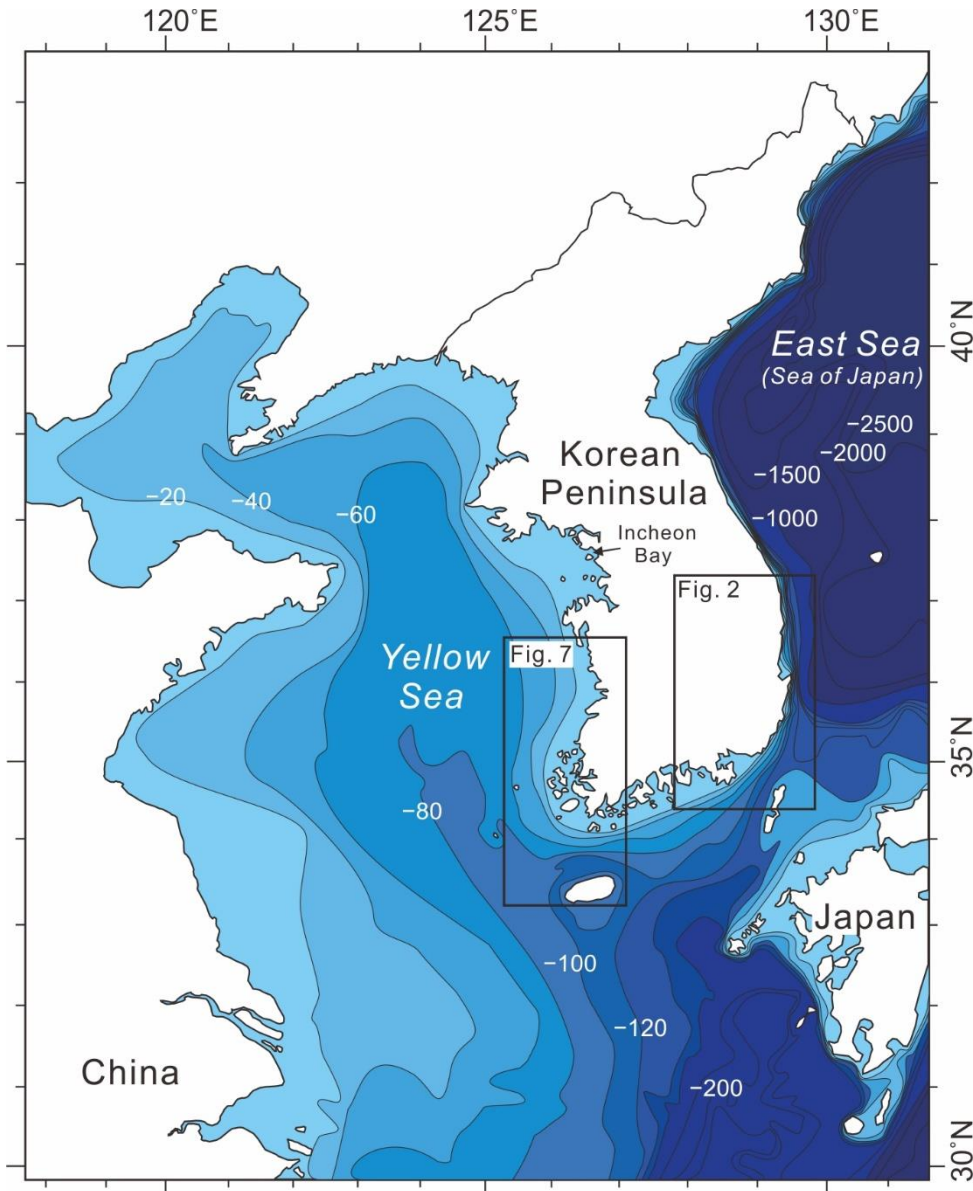

70 **Figure 1: Bathymetry around the Korean Peninsula (modified after Chough et al., 2000; 2004; Cummings et al., 2016). Bathymetric contour interval is in meters. Detailed maps with sampling areas are shown in Figs. 2, 7.**

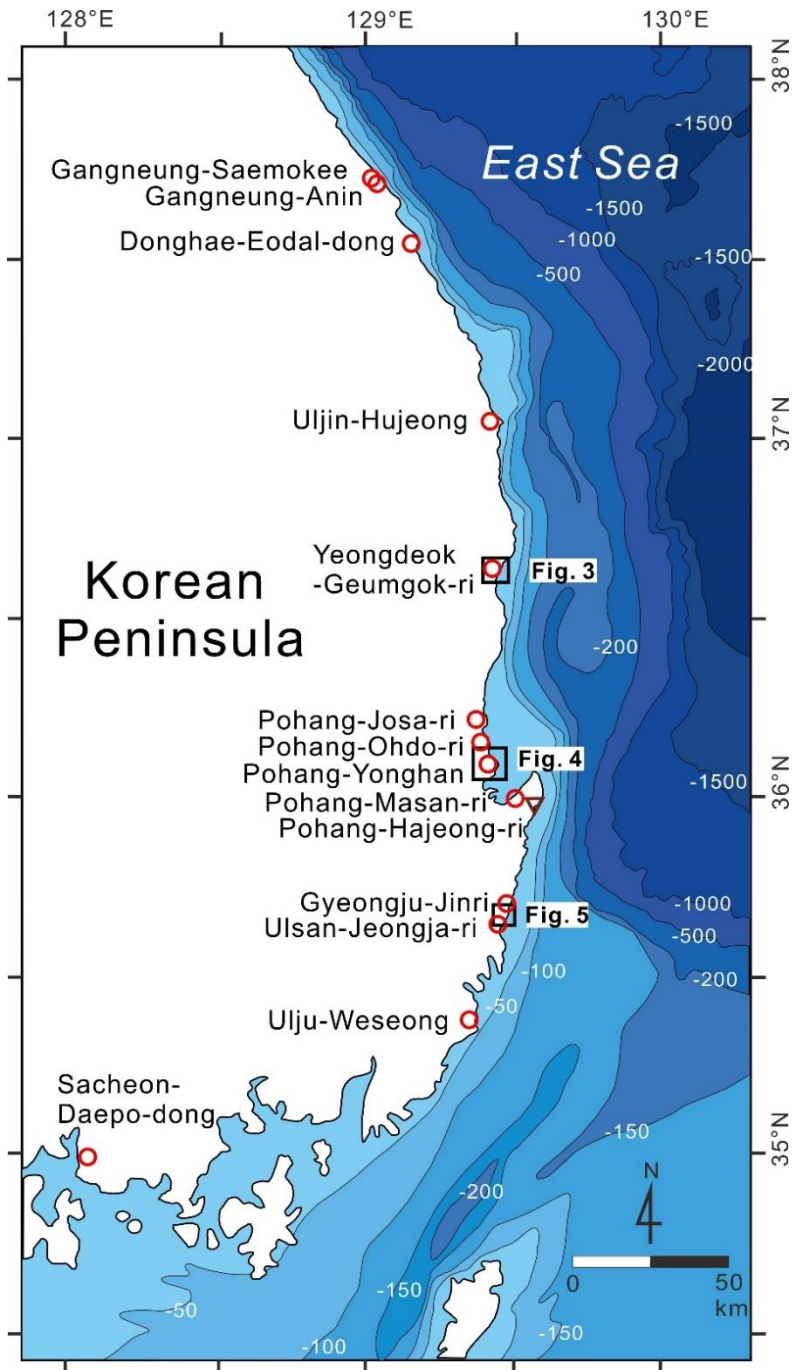

75 **Figure 2:** Map of the eastern and southern Korean Peninsula showing detailed bathymetry and marine terraces locations. Red circles represent sea-level indicator locations based on OSL ages with exception of the Pohang-Masan-ri area which has an additional paleomagnetic-based age. An inverted triangle shows the location of a terrestrial-limiting point. Age data can be found in Table 3. Bathymetric contour interval is in meters.

80 The East Sea is a semi-enclosed marginal sea with an average water depth of about 1350 m and a maximum water depth of about 3700 m west of the Japanese Island of Hokkaido (Chough et al., 2000). The eastern continental shelf is narrow and rapidly transitions into a deep basin (Fig. 1). Along the east coast of Korea, the tides are microtidal ranging from 10 to 30 cm, based on tide-gauges around the coast and satellite altimeter-derived (TOPEX/Poseidon) sea-surface heights (Nam et al., 2004; 2015).

85 The Yellow Sea is a semi-enclosed shallow epicontinental sea with an average water depth of about 55 m and a maximum depth nearing 100 m at its southeastern margin (Fig. 1; Chough et al., 2000). The seafloor of the Yellow Sea is flat and broad (Fig. 1). Based on tide-gauge observations, the tides are semidiurnal, and the tidal range varies from mesotidal (2-4 m) along the open coast to macrotidal (>4 m) within embayments (Oh and Lee, 1998; Cummings et al., 2016). Presently, high-tide beaches, multiple swash bars, cheniers, and sandy tidal-flat deposits are found along the open coast, while mud-rich tidal deposits dominate the embayed coastlines (Figs. 7, 8).

90 Tectonically, the Yellow Sea basins formed due to both India-Eurasia and Pacific-Eurasia plate interactions, which led to repeated extension and rifting since the Late Mesozoic (Ren et al., 2002). Extension-driven regional subsidence formed marginal basins in the Yellow Sea (Watson et al., 1987). Since the Late Miocene, the Yellow Sea is thought to have undergone little to no tectonic subsidence, and, at the least, **has not experienced uplift** (Chough et al., 2000; Li et al., 2016). In the eastern Yellow Sea, the Korean Peninsula is characterized by rias and over 3000 islands along its western and southern coasts (Chough, 95 2013). The seafloor deepens progressively to the southeast along the NNW-SSE axis of the former Late Pleistocene lowstand shorelines (Fig. 1; Chough et al., 2000; 2004). Eustatic sea-level fluctuations during the Quaternary had a great effect on sedimentation in the Yellow Sea (Chough et al., 2000; Jin et al., 2002; Shinn et al., 2007; Yoo et al., 2016). Korean and Chinese onshore and offshore drill cores have revealed alternating terrestrial and shallow marine deposits formed during repeated Pleistocene transgressions and regressions (Li et al., 1991; Marsset et al., 1996; Jin et al., 2002; Chang et al., 2014; Li et al, 100 2016; S.H. Hong et al., 2019; H.H. Yoon et al., 2021). The present Yellow Sea formed during **a large-scale Holocene transgression** of the pre-Holocene terrestrial lowlands between Korea and China (Chough et al., 2000). Many vibracores and drill cores along the west coast of Korea sample those Holocene transgressive intertidal deposits unconformably overlying the pre-Holocene semi-consolidated, oxidized floodplain deposits, forming a retrograding, coarsening-upward succession (Y.A. Park et al. 1998; Y.H. Kim et al., 1999; Lim et al. 2004; K. Choi and Kim 2006; Chang et al., 2014; H.H. Yoon et al., 2021).

## 105 **2.2 Overview of previous studies on the Korean Peninsula**

We divided the east coast of the southern Korean Peninsula into two regions: the northern region extending from Gangneung through Uljin and to Yeongdeok (38° to 36.3°N) and the southern region extending from near Pohang to Ulju (36.3° to 35°N) (Fig. 2). Within the southern region, S.W. Kim (1973) was the first to publish <sup>14</sup>C ages from the marine terraces of Korea. He divided the marine terraces into 6 elevation groups ranging from 3 to 130 m above mean sea level (MSL) and suggested the 110 highest two groups may have formed during a Pleistocene interglacial period. A separate study across much of the same region



by G.H. Oh (1977) divided the marine terraces into 3 elevation groups ranging from 10 to 80 m above MSL. When investigating the same region, D.Y. Lee (1987) suggested that the marine terraces were divisible into 5 elevation groups ranging from 3 m to 90 m above MSL. Based on their sedimentology and stratigraphy, D.Y. Lee (1987) suggested the highest, middle three, and lowest groups of marine terraces formed during the Pliocene, Pleistocene, and Holocene, respectively.

115

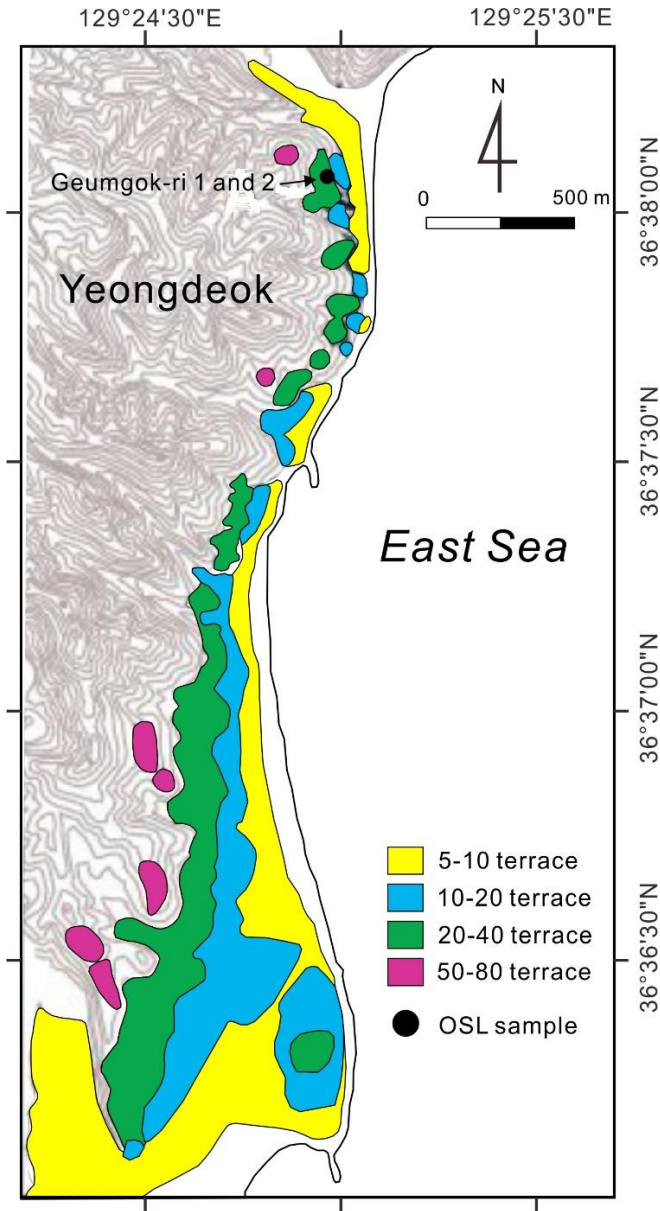

Figure 3: Marine terraces at Subsite Geumgok-ri of the Yeongdeok area in the eastern Korean Peninsula (modified after S.C. Hong, 2014). The topographic contour interval is 10 meters. For location, see Fig. 2.

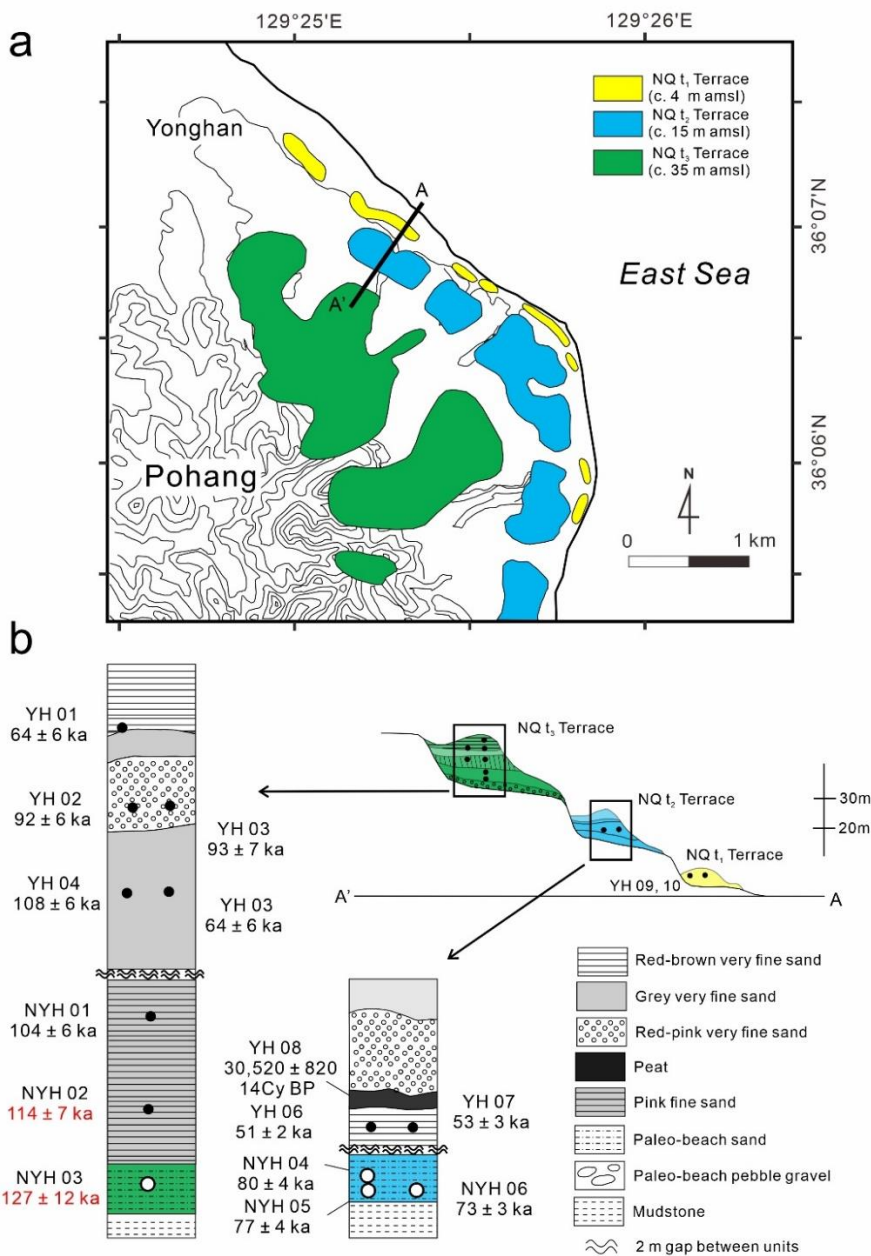

120

**Figure 4: Marine terraces and columnar sections at Subsite Yonghan-2 of the Pohang area in the eastern Korean Peninsula (modified after J.H. Choi et al., 2009). (a) Plan view on the shoreline showing three ages of terraces. (b) Schematic cross-section and columnar sections of paleo-beach sediments overlain by aeolian sand on terraces. Open and closed circles indicate the location of OSL ages from paleo-beach and aeolian sand sediments, respectively. Two ages in red indicate LIG ages (WALIS LUM ID #449 and #450 in Table 3). Sites YH09 and YH10 in the NQ<sub>1</sub> terrace (yellow) were dated to 0.09±0.01 ka and 0.11±0.01 ka by OSL, respectively (J.H. Choi et al., 2009). The topographic contour interval is 10 meters. For location, see Fig. 2. amsl: above mean sea level**

125

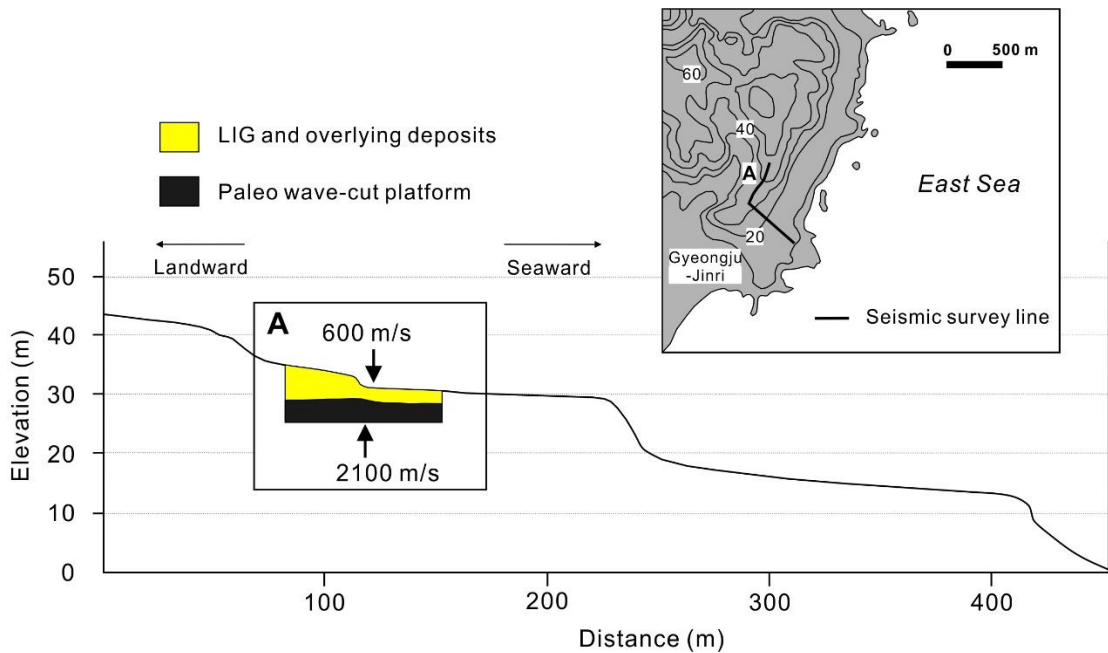

130 **Figure 5: Seismic interpretation and calculated elevation of the buried LIG wave-cut platform at Subsite Jinri of the Gyeongju area, based on seismic velocities between the overlying deposits and a paleo wave-cut platform (modified after J.W. Kim et al., 2007a). The topographic contour interval is 10 meters. For location, see Fig. 2.**

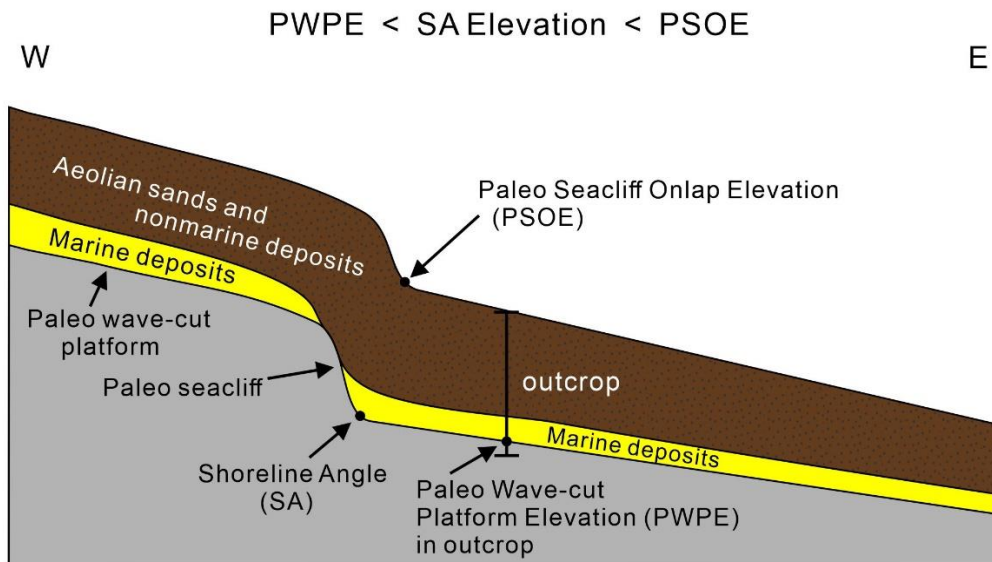

135 **Figure 6: A schematic marine terrace commonly occurring along the eastern Korean Peninsula. Note that the shoreline angle (SA) elevation is between the paleo wave-cut platform elevation (PWPE) measured in outcrop and the paleo seacliff onlap elevation (PSOE)**



measured in surface topography.

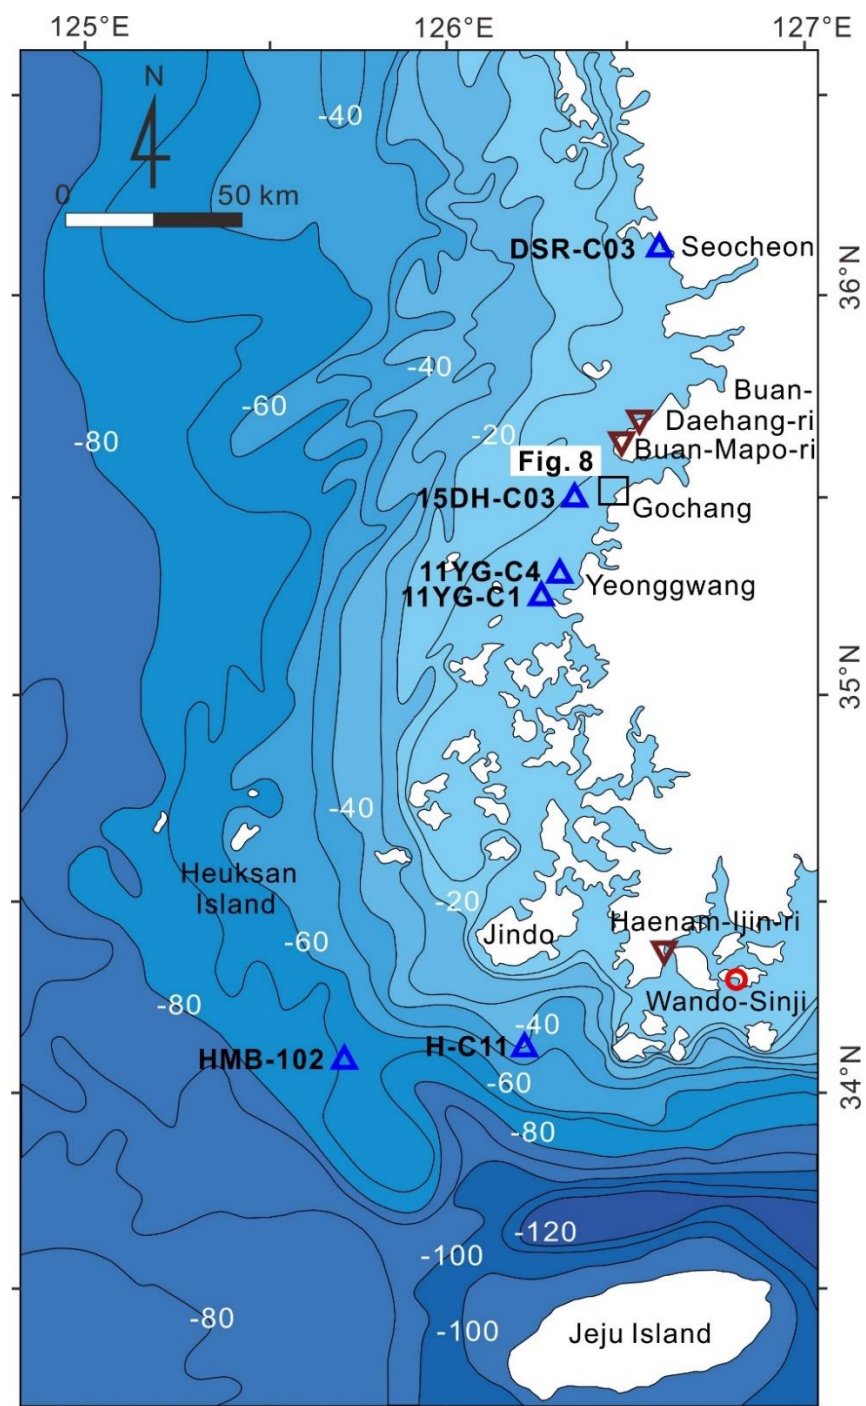

Figure 7: Location of nearshore drill cores and onshore sites in the western Korean Peninsula. A red circle represents the location of sea-level indicator while blue triangles and brown inverted triangles represent marine-limiting and terrestrial-limiting site locations, respectively. Age data can be found in Table 3. Bathymetric contour interval is in meters.

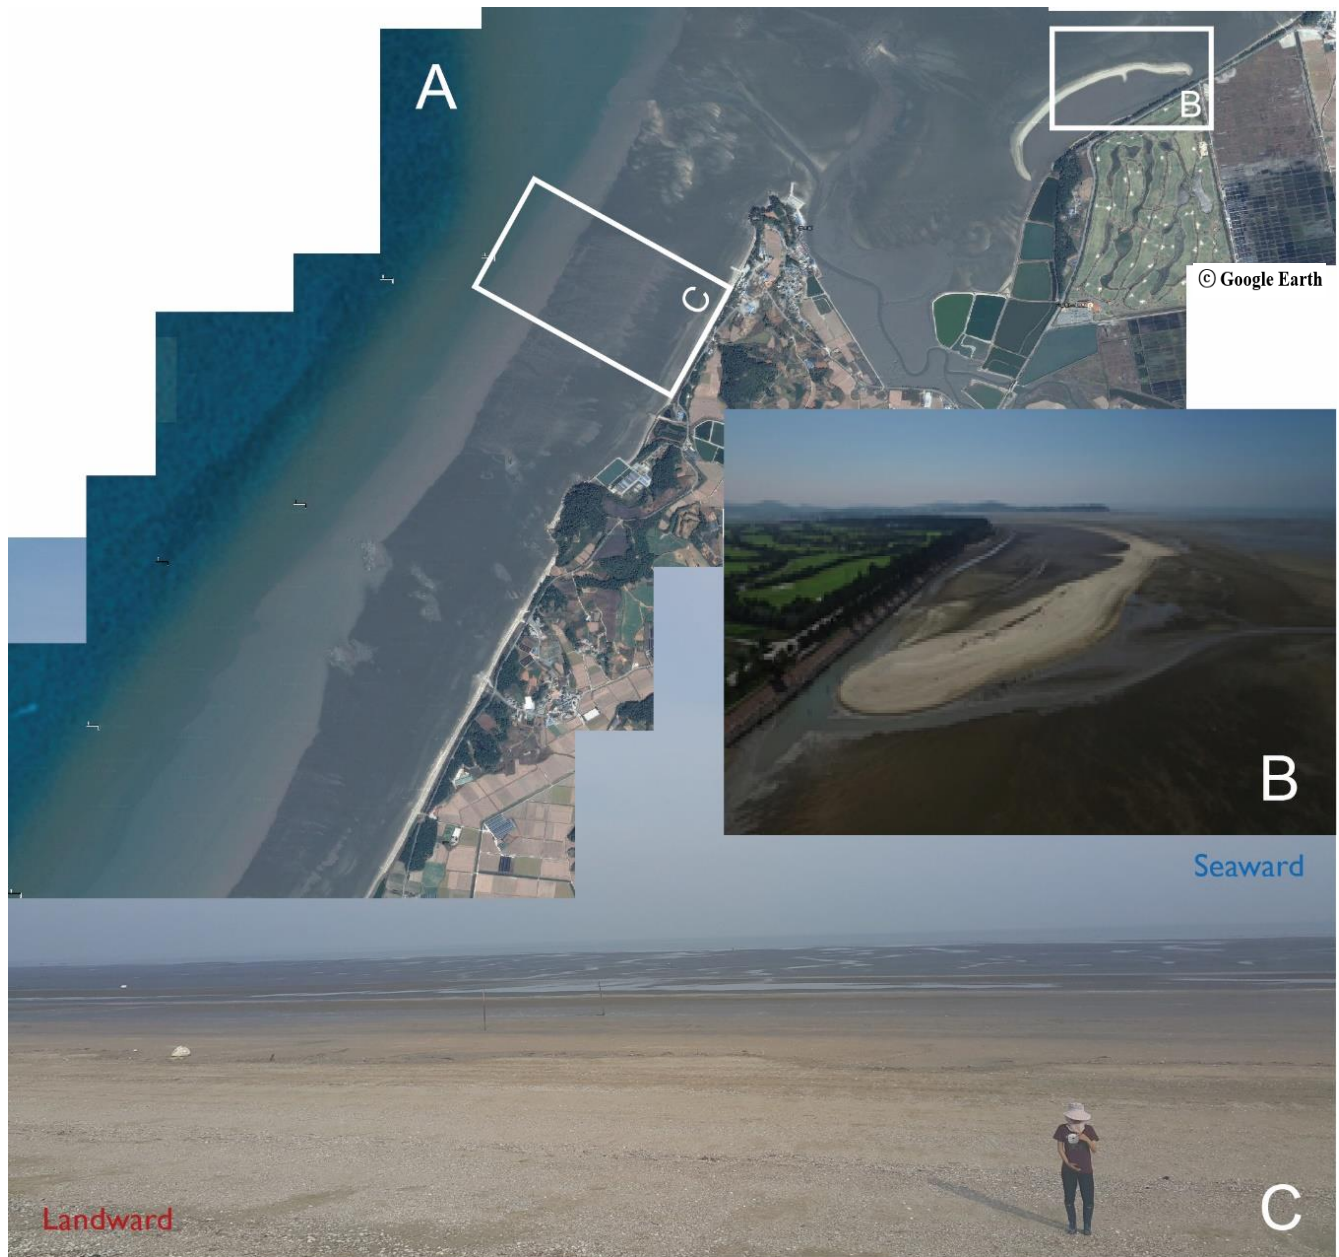

145 **Figure 8: High-tide beaches, multiple swash bars, cheniers, and sandy tidal-flat deposits within the intertidal zone of the open coast along the western Korean coast (modified after Chun et al., 2018). (a) A satellite image with insets of landscape photographs in the Gochang area (from © Google Earth), (b) A chenier on the tidal flat (Chun et al., 2018), (c) A high-tide beach of coarse sand and middle- to low-tide intertidal flats of muddy fine sand. The 2.0 ~ 3.0 m sand predominantly fines seaward. For location, see Fig. 7.**

In the northern region, the first LIG age (124 ka B.P.) was obtained from a fluvial terrace in the downstream part of the Seomseok river, located in Gangneung (Fig. 2), using amino acid racemization dating of peats (S.G. Choi, 1993). In the southern region, another LIG age (125 ka B.P.) was obtained from a separate fluvial terrace, located near the Pohang shoreline (Fig. 2), using the same method (S.G. Choi, 1996). Since this initial work, most research has focused not on numerical dating, but documenting the elevations, sedimentary characteristics, and stratigraphy of deposits overlying the marine terraces along the eastern shorelines (e.g., S.G. Choi, 1995a, 1995b, 2016a, 2016b, 2018, 2019; S.G. Choi and Chang, 2019; Hwang and Yoon, 1996, 2020; Hwang et al., 2012; S.O. Yoon et al., 1999, 2003, 2014).

In the 2000s, OSL dating started to be applied to the sandy deposits overlying the marine terraces of the eastern Korean Peninsula. The first numerical age derived by OSL dating of paleo-beach sediments overlying a marine terrace was obtained near the Ulju shoreline within the southern region (dated to  $112 \pm 7$  ka) (J.H. Choi et al., 2003). Other studies soon added more OSL ages on the LIG marine terraces along the eastern shoreline of the Korean Peninsula (J.H. Choi, 2004; J.W. Kim et al., 2005a, 2007a, 2007b; S.J. Choi et al., 2008; S.C. Hong, 2014; S.Y. Lee et al., 2015; S.J. Choi, 2016; C.S. Park et al., 2017; G.Y. Lee and Park, 2019b).

Shim (2006) applied paleomagnetic analysis to outcrop sections of paleo-beach sand overlying a marine terrace along the Pohang shoreline within the southern region (Fig. 2), which was interpreted as MIS 5e deposits (114 to 120 ka). Tephrochronology and tephrostratigraphic correlation methods have also been used to suggest an MIS 5e age on deposits overlying a marine terrace at an elevation 15-20 m above MSL in the Gyeongju area of the southern region (Fig. 2; Inoue et al., 2002), but the age interpretation was quickly challenged because the dated deposits may have been reworked from sediments of a higher terrace (S.J. Choi, 2003, 2009; S.J. Choi et al., 2008).

Other efforts have been underway to identify LIG marine terraces or shoreline deposits along the southern and western shorelines of the Korean Peninsula (Lee G.Y. and Park, 2006; S.G. Choi, 2006; J.H. Yang, 2008, 2011; J.H. Yang et al., 2013; S.O. Yoon et al., 2015; W.J. Shin et al., 2016; J.S. Oh, 2018; Lee G.Y. and Park, 2018). However, most of these studies relied on elevation or stratigraphic correlation in the absence of numerical ages or analyzed the alluvial deposits overlying the shoreline deposits. Recently, LIG shoreline deposits were discovered on the basis of OSL ages in the Sacheon, Wando, and Haenam areas (Figs. 2, 7; D.Y. Yang et al., 2016; J.Y. Shin, 2018; G.Y. Lee and Park, 2018, 2019a; W.J. Shin et al., 2019). Arguably the best sea-level constraints from these studies are those of W.J. Shin et al. (2019). W.J. Shin et al. (2019) identified paleo-intertidal/beach deposits composed of alternating gravel and sand beds with shell fragments along the southwest Korean shoreline near the Wando shoreline (Fig. 7). Their OSL ages were obtained from intertidal/beach deposits and dated to between  $115.9 \pm 9.7$  and  $127.5 \pm 8.5$  ka at an elevation of 3.5 to 2.8 m above MSL (W.J. Shin et al., 2019).

### 3 Methods

#### 3.1 Elevation details

##### 3.1.1 Datums

180 The Korean geodetic horizontal point is based on the World Geodetic Reference System (ITRF2000 & GRS80). This horizontal and vertical datum has been well managed for the national territory by the National Geographic Information Institute (2021). The Korean official vertical datum is based on mean sea level within Incheon Bay from 1913 to 1916 (Fig. 1). Using this datum, the institute installed a series of nationally unified control points and benchmarks across the entire Korean peninsula and territorial islands. All elevation data in this paper were measured using this national geodetic system.

### 185 **3.1.2 Elevation measurements**

All surveys include GPS or DGPS surveying methods. Most surveys also used an electro-optical distance measuring system (total station) to determine the elevation at specific points from a local benchmark of the Korean official vertical datum. Some locations were determined by comparing the GPS coordinates of the sampling point with a 1:5000 topographic map. Marine surveys used a virtual reference station linked to a GPS (VRS-GPS) or DGPS and a high-resolution echosounder aboard the  
190 drilling ship.

## **3.2 Coring**

Cores were acquired using a hydraulic-powered drill on a barge or a vibrocorer deployed from a ship. Sediment sampling was performed using a standard thin-walled 55-mm diameter tube sampler. In the laboratory, cores were split lengthwise, described, photographed, and sampled. Core descriptions were based on sediment characteristics, including color, lithology, texture, grain  
195 size, and structure.

## **3.3 Dating techniques**

### **3.3.1 Optically stimulated luminescence**

Sixty-one of the 62 **numerical** ages in this dataset were acquired using OSL. Fifty-one OSL age measurements were conducted on coarse-grained sand or fine-grained silt quartz separates. Seven additional ages were obtained from K-feldspar minerals (IRSL, Infrared Stimulated Luminescence) isolated from coarse-grained sand and another 3 ages were obtained from K-feldspar minerals of gravel surfaces (rock surface OSL dating) (e.g., J.H. Choi et al., 2004; S.C. Hong et al., 2013; S.C. Hong, 2014, 2016). All OSL ages were conducted using the single-aliquot regenerative-dose (SAR) procedure (Murray and Wintle 2000) **with error ranges listed as either  $\pm 1\sigma$  SE or  $\pm 2\sigma$  SE in accordance with the original studies.**

### **3.3.2 Paleomagnetism**

205 For the paleomagnetic study, sediment samples were collected almost continuously from an outcrop using non-magnetic  $22 \times 22 \times 22$  mm<sup>3</sup> plastic cubes. The remanent magnetic moment of each sample was measured by a high-temperature superconducting magnetometer (F.I.T Messtechnik GmbH, HSM2) at Hanyang University (Shim, 2006). Alternating field demagnetization (Molspin Co.) and anhysteretic/isothermal remanent magnetization experiments were performed to isolate the

characteristic remanent magnetization of each sample (Shim, 2006). Magnetic susceptibility was measured by a susceptibility  
210 meter (Bartington Co., MS2F) for determining the types and amounts of ferrimagnetic minerals in the sediments.

### 3.3.3 Relative sea-level elevation assignments

#### 3.3.3.1 Paleo sea level from marine terraces

The approach used to reconstruct paleo RSLs is in part dependent on the landform used (Tables 1, 2). The most commonly  
applied approach to reconstructing past RSLs from marine terraces is to use the elevation of the shoreline angle (SA in Fig. 6;  
215 “inner edge” of Bradley and Griggs, 1976 or junction between the marine platform and the paleo sea cliff of Muhs et al., 1990)  
as a proxy for paleo sea levels. Unfortunately for most of the data collected to date across the marine terraces of the east coast  
of the Korean Peninsula, the shoreline angle (SA) elevation is unknown because the paleo-sea cliffs are covered by overlying  
deposits (Fig. 6). **On the only 2 among the 13 subsites along the east coast (Fig. 2), the SA elevations of the marine terraces**  
were measured in the original studies (Table 2; Fig. 5). In the case of an unknown shoreline angle elevation but where a paleo  
220 wave-cut platform elevation (PWPE) and a paleo seacliff onlap elevation (PSOE) were measured (Table 2; Fig. 6), we  
expressed the estimated shoreline angle elevation ( $SA_e$ ) as the mid-point elevation between the PWPE and the PSOE with an  
error range ( $\delta_{SA_e}$ ) of  $\frac{1}{2}$  that elevation difference according to the following equations:

$$SA_e = \frac{(PSOE + PWPE)}{2} \quad (1)$$

$$\delta_{SA_e} = \frac{(PSOE - PWPE)}{2} \quad (2).$$

225 This approach allowed us to estimate RSLs from **three** additional subsites where the PWPE and the PSOE were measured in  
the field (Table 2; Fig. 6).

RSL is calculated from all sea-level indicators using the following equations:

$$\text{Paleo RSL} = E - \text{RWL} \pm \frac{\delta_{RSL}}{2} \quad (3)$$

230 Where **E** represents the elevation of the sea-level indicator, **RWL** represents the reference water level, and  $\delta_{RSL}$  accounts for  
the uncertainties in the paleo RSL (Rovere et al., 2016). Furthermore,

$$\text{RWL} = \frac{U_l + L_l}{2} = \frac{SWSH + d_b}{2} \quad (4)$$

where  $U_l$  represents the upper limit of the modern analogue landform’s elevation,  $L_l$  represents the lower limit of the modern  
analogue landform’s elevation, SWSH represents storm wave swash height, and  $d_b$  represents the breaking depth. Each of  
these values was obtained from local sources (Table 1). Breaking depth was approximated using the following equation:

$$235 \quad d_b = -\frac{H_s}{0.78} \quad (5)$$

where  $H_s$  represents an average significant wave height during one year with the constant 0.78 commonly used for wave  
breaking criteria on a smooth, flat slope (Table 1; U.S. Army Corps of Engineers, 1984; Rovere et al., 2016). The uncertainty  
in the paleo RSL ( $\delta_{RSL}$ ) was determined via:



$$\delta_{RSL} = \sqrt{E_e^2 + \left(\frac{IR}{2}\right)^2} = \sqrt{E_e^2 + \left(\frac{U_l - L_l}{2}\right)^2} = \sqrt{E_e^2 + \left(\frac{SWSH - d_b}{2}\right)^2} \quad (6)$$

240 where  $E_e$  and IR represent an error in the elevation measurement (standard deviation) and the indicative range, respectively (Rovere et al., 2016). For the case of marine terraces whose shoreline angle was measured or estimated, their RSL equivalent (Paleo SA RSL) would be:

$$\text{Paleo SA RSL} = \frac{PSOE + PWPE}{2} - \text{RWL} \pm \left( \frac{\delta_{RSL}}{2} + \frac{PSOE - PWPE}{2} \right) \quad (7).$$

245 In cases along the east coast of the Korean Peninsula where both the elevation of the shoreline angle or paleo wave-cut platform are unknown, we base our estimates of RSL by treating the dated deposits overlying the marine terraces as beach sands using Eq. 8 such that

Paleo RSL at marine-terrace data points (Landform Type 1 in Table 1)

$$= E - \text{RWL} \pm \sqrt{E_e^2 + \left(\frac{SWSH - d_b}{2}\right)^2} \quad (8).$$

250 Similar to the earlier estimates, we also used the local storm wave swash height (SWSH), average significant wave heights ( $H_s$ ), and breaking depths ( $d_b$ ) to calculate 30 paleo RSLs from the elevations of the beach sands overlying the marine terraces along the east coast (Table 3).

**Table 1. Landforms used for calculating paleo relative sea level in this study.**

| Type | Landform                                                                         | Upper limit                    | Lower limit                                                     | Definitions and Data                                                                                                                                                                                                                                                                                                                                                                                                                                                                                                                                                                                                                                                     |
|------|----------------------------------------------------------------------------------|--------------------------------|-----------------------------------------------------------------|--------------------------------------------------------------------------------------------------------------------------------------------------------------------------------------------------------------------------------------------------------------------------------------------------------------------------------------------------------------------------------------------------------------------------------------------------------------------------------------------------------------------------------------------------------------------------------------------------------------------------------------------------------------------------|
| 1    | Beach sands overlying marine terraces (“marine terraces” of Rovere et al., 2016) | Storm Wave Swash Height (SWSH) | Breaking depth ( $d_b$ )                                        | <p><b>MHHW</b>: mean higher high water, the average of the higher high water height of each tidal day (Pugh and Woodworth, 2014)</p> <p><b>MLLW</b>: mean lower low water, the average of the lower low water height of each tidal day (Pugh and Woodworth, 2014)</p>                                                                                                                                                                                                                                                                                                                                                                                                    |
| 2    | Beach deposits (Rovere et al., 2016)                                             | Ordinary berm (ob)             | Breaking depth ( $d_b$ )                                        | This study used the average heights of statistically estimated MHHW and MLLW of each tidal day observed during January, February, and March 2021 in the nearest station from the shoreline at each subsite (KHOA, 2021)                                                                                                                                                                                                                                                                                                                                                                                                                                                  |
| 3    | Beach rock (Rovere et al., 2016)                                                 | Spray zone (sz)                | Breaking depth ( $d_b$ )                                        | <p><b>SWSH</b>: storm wave swash height, the maximum elevation reached by extreme storms on the beach (Otvos, 2000)</p>                                                                                                                                                                                                                                                                                                                                                                                                                                                                                                                                                  |
| 4    | Tidal-flat clastic deposits                                                      | Spray zone (sz)                | Sum of mean lower low water and breaking depth ( $MLLW + d_b$ ) | <p><b>H<sub>s</sub></b>: average significant wave height during one year (U.S. Army Corps of Engineers, 1984)</p> <p>This study used the maximum wave height for SWSH and average significant wave height for H<sub>s</sub> observed during 2020 in the nearest station from the shoreline at each subsite (KHOA, 2021).</p> <p><b>d<sub>b</sub></b>: breaking depth, for a smooth, flat slope, <math>d_b = -H_s/0.78</math> (U.S. Army Corps of Engineers, 1984)</p> <p><b>ob</b>: ordinary berm height, <math>ob = 0.2 \times H_s + MHHW</math> (Mayer and Kriebel, 1994)</p> <p><b>sz</b>: spray zone height, <math>sz = 2 \times ob</math> (Rovere et al., 2016)</p> |

**Table 2. Summary of shoreline angle elevations along the east coast of the Korean Peninsula.**

| No. | Site      | Subsite    | Sample latitude (°) | Sample longitude (°) | Landform Type in Table 1 | Shoreline angle elevation (m) | ± Error range (m) | Measured elevation of paleo wave-cut platform (PWPE) (m) | Measured elevation of paleo seacliff onlap (PSOE) (m) | Topographic elevation range of paleo-shoreline deposits (m) | Reference              |
|-----|-----------|------------|---------------------|----------------------|--------------------------|-------------------------------|-------------------|----------------------------------------------------------|-------------------------------------------------------|-------------------------------------------------------------|------------------------|
| 1   | Gangneung | Anin       | 37.7401             | 128.9716             | 1                        | 27.5                          | 2.5               | 21.1                                                     | 30                                                    | 20~30                                                       | S.Y. Lee et al., 2015  |
| 2   | Donghae   | Eodal-dong | 37.5657             | 129.1181             | 1                        | 28.0                          | 2.0               | 26.0                                                     | 30                                                    | 25~30                                                       | S.C. Hong, 2014        |
| 3   | Pohang    | Yonghan-2  | 36.1085             | 129.4230             | 1                        | 35.0                          | -                 | 34.4                                                     | ?                                                     | ?                                                           | J.H. Choi et al., 2009 |
| 4   | Pohang    | Masan-ri   | 36.0152             | 129.4826             | 1                        | 23.5                          | 1.5               | 22.0                                                     | 25                                                    | 10~25                                                       | J.W. Kim et al., 2005b |
| 5   | Gyeongju  | Jinri      | 35.6827             | 129.4686             | 1                        | 28.0                          | 1.0               | 27~29                                                    | 45                                                    | 30~45                                                       | J.W. Kim et al., 2007a |

**Table 3. Summary of LIG relative sea levels and ages as data points in the Korean Peninsula. For references, refer to the text. SLI: sea level indicator; TL: terrestrial limiting record; ML: marine limiting record.**

| WALIS<br>LUM ID | Site          | Subsite                                 | Sample<br>latitude<br>(°) | Sample<br>longitude<br>(°) | Indicator<br>Type | Landfor<br>m type<br>in Table<br>1 | Paleo<br>RSL<br>(m) | ± Error<br>of paleo<br>RSL | Elevation<br>above<br>MSL (m) | Dating<br>method | OSL<br>mineral<br>type                | Age (ka) | ± Age<br>uncertainty<br>(ka) and<br>error range |
|-----------------|---------------|-----------------------------------------|---------------------------|----------------------------|-------------------|------------------------------------|---------------------|----------------------------|-------------------------------|------------------|---------------------------------------|----------|-------------------------------------------------|
| 432             | Gang<br>neung | Saemok<br>ee                            | 37.7402                   | 128.9716                   | SLI               | 1                                  | 26.9                | 2.2                        | 29.7                          | OSL              | K-<br>Feldspar                        | 128.3    | 24.5<br>± 1σ SE                                 |
| 433             | Gang<br>neung | Saemok<br>ee                            | 37.7402                   | 128.9716                   | SLI               | 1                                  | 26.9                | 2.2                        | 29.7                          | OSL              | K-<br>Feldspar                        | 124.1    | 25.3<br>± 1σ SE                                 |
| 434             | Gang<br>neung | Saemok<br>ee<br>surface<br>age          | 37.7402                   | 128.9716                   | SLI               | 1                                  | 25.9                | 2.2                        | 28.7                          | OSL              | K-<br>Feldspar<br>(gravel<br>surface) | 133.7    | 13.9<br>± 1σ SE                                 |
| 435             | Gang<br>neung | Anin                                    | 37.7401                   | 128.9716                   | SLI               | 1                                  | 20.3                | 2.2                        | 23.08                         | OSL              | Quartz                                | 117.0    | 6.0<br>± 1σ SE                                  |
| 436             | Gang<br>neung | Anin                                    | 37.7401                   | 128.9716                   | SLI               | 1                                  | 20.3                | 2.2                        | 23.09                         | OSL              | Quartz                                | 129.0    | 8.0<br>± 1σ SE                                  |
| 492             | Dong<br>hae   | Eodal-<br>dong 1                        | 37.5657                   | 129.1181                   | SLI               | 1                                  | 27.4                | 2.2                        | 30.2                          | OSL              | Quartz                                | 126.1    | 10.1<br>± 1σ SE                                 |
| 437             | Dong<br>hae   | Eodal-<br>dong 1                        | 37.5657                   | 129.1181                   | SLI               | 1                                  | 27.4                | 2.2                        | 30.2                          | OSL              | K-<br>Feldspar                        | 127.5    | 24.6<br>± 1σ SE                                 |
| 438             | Dong<br>hae   | Eodal-<br>dong 2                        | 37.5657                   | 129.1181                   | SLI               | 1                                  | 26.4                | 2.2                        | 29.2                          | OSL              | Quartz                                | 128.0    | 14.0<br>± 1σ SE                                 |
| 439             | Dong<br>hae   | Eodal-<br>dong 2                        | 37.5657                   | 129.1181                   | SLI               | 1                                  | 26.4                | 2.2                        | 29.2                          | OSL              | K-<br>Feldspar                        | 124.1    | 23.7<br>± 1σ SE                                 |
| 440             | Dong<br>hae   | Eodal-<br>dong 3                        | 37.5657                   | 129.1181                   | SLI               | 1                                  | 25.4                | 2.2                        | 28.2                          | OSL              | Quartz                                | 112.1    | 7.7<br>± 1σ SE                                  |
| 441             | Dong<br>hae   | Eodal-<br>dong 3                        | 37.5657                   | 129.1181                   | SLI               | 1                                  | 25.4                | 2.2                        | 28.2                          | OSL              | K-<br>Feldspar                        | 125.3    | 24.0<br>± 1σ SE                                 |
| 442             | Uljin         | Hujeong<br>1<br>(Gwang<br>yoon<br>Apt.) | 37.0619                   | 129.4153                   | SLI               | 1                                  | 28.2                | 1.7                        | 30                            | OSL              | Quartz                                | 119.0    | 15.0<br>± 1σ SE                                 |
| 443             | Uljin         | Hujeong<br>2<br>(Gwang<br>yoon<br>Apt.) | 37.0619                   | 129.4153                   | SLI               | 1                                  | 32.2                | 1.7                        | 34                            | OSL              | Quartz                                | 111.0    | 9.0<br>± 1σ SE                                  |
| 444             | Yeon<br>gdeok | Geumgo<br>k-ri 1                        | 36.6362                   | 129.4150                   | SLI               | 1                                  | 19.4                | 1.7                        | 21.2                          | OSL              | K-<br>Feldspar                        | 124.5    | 25.3<br>± 1σ SE                                 |
| 445             | Yeon<br>gdeok | Geumgo<br>k-ri 2                        | 36.6362                   | 129.4150                   | SLI               | 1                                  | 22.1                | 1.7                        | 23.9                          | OSL              | K-<br>Feldspar                        | 122.1    | 24.9<br>± 1σ SE                                 |

|     |              |                                   |         |          |     |   |      |     |       |                    |                                       |       |                                          |
|-----|--------------|-----------------------------------|---------|----------|-----|---|------|-----|-------|--------------------|---------------------------------------|-------|------------------------------------------|
| 446 | Pohan<br>g   | Josa-ri                           | 36.2194 | 129.3801 | SLI | 1 | 20.2 | 1.7 | 22    | OSL                | Quartz                                | 116.0 | 8.0<br>$\pm 1\sigma$ SE                  |
| 447 | Pohan<br>g   | Ohdo-ri                           | 36.1586 | 129.3969 | SLI | 1 | 23.4 | 1.7 | 25.23 | OSL                | Quartz                                | 137.0 | 9.0<br>$\pm 1\sigma$ SE                  |
| 448 | Pohan<br>g   | Yongha<br>n-1<br>(silica<br>mine) | 36.1093 | 129.4161 | SLI | 1 | 30.2 | 1.7 | 32    | OSL                | Quartz                                | 123.0 | 9.0<br>$\pm 1\sigma$ SE                  |
| 449 | Pohan<br>g   | Yongha<br>n-2a                    | 36.1085 | 129.4230 | TL  | 1 | 33.7 | 1.7 | 35.5  | OSL                | Quartz                                | 114.0 | 7.0<br>$\pm 1\sigma$ SE                  |
| 450 | Pohan<br>g   | Yongha<br>n-2b                    | 36.1085 | 129.4230 | SLI | 1 | 33.2 | 1.7 | 35    | OSL                | Quartz                                | 127.0 | 12.0<br>$\pm 1\sigma$ SE                 |
| 451 | Pohan<br>g   | Masan-ri                          | 36.0152 | 129.4826 | SLI | 1 | 21.2 | 1.7 | 23    | OSL                | Quartz                                | 119.0 | 8.0<br>$\pm 1\sigma$ SE                  |
| 452 | Pohan<br>g   | Masan-ri                          | 36.0152 | 129.4826 | SLI | 1 | 21.7 | 1.7 | 23.5  | OSL                | Quartz                                | 111.0 | 5.0<br>$\pm 1\sigma$ SE                  |
| 453 | Pohan<br>g   | Masan-ri                          | 36.0152 | 129.4826 | SLI | 1 | 22.2 | 1.7 | 24    | OSL                | Quartz                                | 116.0 | 7.0<br>$\pm 1\sigma$ SE                  |
| 454 | Pohan<br>g   | Masan-ri                          | 36.0152 | 129.4826 | SLI | 1 | 22.7 | 1.7 | 24.5  | OSL                | Quartz                                | 107.0 | 8.0<br>$\pm 1\sigma$ SE                  |
| –   | Pohan<br>g   | Masan-ri                          | 36.0152 | 129.4826 | SLI | 1 | 21.2 | 1.7 | 23    | Paleoma<br>gnetism | –                                     | 117.6 | 2.7<br>$\pm 1\sigma$ SE                  |
| 455 | Pohan<br>g   | Hajeong<br>-ri                    | 35.9716 | 129.5493 | TL  | 1 | 33.2 | 1.7 | 35    | OSL                | Quartz                                | 128.0 | 12.0<br>$\pm 2\sigma$ SE                 |
| 456 | Gyeo<br>ngju | Jinri                             | 35.6827 | 129.4686 | SLI | 1 | 32.3 | 2.6 | 36    | OSL                | Quartz                                | 116.0 | 6.0<br>$\pm 1\sigma$ SE                  |
| 457 | Gyeo<br>ngju | Jinri                             | 35.6827 | 129.4686 | SLI | 1 | 32.3 | 2.6 | 36    | OSL                | Quartz                                | 126.0 | 10.0<br>$\pm 1\sigma$ SE                 |
| 459 | Ulsan        | Jeongja-<br>ri                    | 35.6311 | 129.4331 | SLI | 1 | 18.8 | 2.6 | 22.5  | OSL                | Quartz                                | 113.0 | 39.0<br>$\pm 1\sigma$ or $2\sigma$<br>SE |
| 458 | Ulju         | Weseon<br>g                       | 35.3821 | 129.3414 | SLI | 1 | 10.3 | 2.6 | 14    | OSL                | Quartz                                | 112.0 | 7.0<br>$\pm 1\sigma$ SE                  |
| 460 | Sache<br>on  | Daepo-<br>dong                    | 34.9900 | 128.0427 | SLI | 2 | 6.0  | 0.8 | 6     | OSL                | K-<br>Feldspar<br>(cobble<br>surface) | 111.2 | 16.0<br>$\pm 1\sigma$ SE                 |
| 461 | Sache<br>on  | Daepo-<br>dong                    | 34.9900 | 128.0427 | SLI | 2 | 6.0  | 0.8 | 6     | OSL                | K-<br>Feldspar<br>(cobble<br>surface) | 102.5 | 14.7<br>$\pm 1\sigma$ SE                 |
| 462 | Wand<br>o    | Sinji 1                           | 34.3258 | 126.8286 | SLI | 2 | 2.5  | 0.9 | 2.8   | OSL                | Quartz                                | 127.5 | 8.5<br>$\pm 1\sigma$ SE                  |



|     |           |            |         |          |     |   |       |     |       |     |        |       |                          |
|-----|-----------|------------|---------|----------|-----|---|-------|-----|-------|-----|--------|-------|--------------------------|
| 463 | Wando     | Sinji 1    | 34.3258 | 126.8286 | SLI | 2 | 3.2   | 0.9 | 3.5   | OSL | Quartz | 115.9 | 9.7<br>$\pm 1\sigma$ SE  |
| 464 | Wando     | Sinji 3    | 34.3280 | 126.8258 | SLI | 2 | 5.8   | 0.9 | 6.1   | OSL | Quartz | 108.0 | 18.0<br>$\pm 1\sigma$ SE |
| 465 | Haenam    | Ijin-ri 1  | 34.3962 | 126.6175 | TL  | 3 | 6.4   | 1.3 | 7.51  | OSL | Quartz | 121.0 | 10.0<br>$\pm 2\sigma$ SE |
| 466 | Haenam    | Ijin-ri 2  | 34.3962 | 126.6175 | TL  | 3 | 5.3   | 1.3 | 6.49  | OSL | Quartz | 128.0 | 10.0<br>$\pm 2\sigma$ SE |
| 467 | Haenam    | Ijin-ri 3  | 34.3962 | 126.6175 | TL  | 3 | 4.3   | 1.3 | 5.41  | OSL | Quartz | 128.0 | 9.0<br>$\pm 2\sigma$ SE  |
| 468 | Buan      | Daehang-ri | 35.6790 | 126.5312 | TL  | 3 | 8.2   | 2.0 | 10.78 | OSL | Quartz | 112.0 | 24.0<br>$\pm 1\sigma$ SE |
| 469 | Buan      | Mapo-ri    | 35.6523 | 126.5073 | TL  | 3 | 6.2   | 2.0 | 8.8   | OSL | Quartz | 130.0 | 20.0<br>$\pm 1\sigma$ SE |
| 470 | Seocheon  | Dasa-ri 1  | 36.1043 | 126.6078 | ML  | 4 | -3.8  | 2.5 | -1.88 | OSL | Quartz | 116.0 | 10.0<br>$\pm 1\sigma$ SE |
| 471 | Seocheon  | Dasa-ri 2  | 36.1043 | 126.6078 | ML  | 4 | -5.7  | 2.5 | -3.82 | OSL | Quartz | 108.0 | 8.0<br>$\pm 1\sigma$ SE  |
| 472 | Yeon-ggwa | Baeksu 1   | 35.3032 | 126.3212 | ML  | 4 | -22.8 | 2.5 | -20.8 | OSL | Quartz | 110.0 | 6.6<br>$\pm 2\sigma$ SE  |
| 473 | Yeon-ggwa | Baeksu 2   | 35.3032 | 126.3212 | ML  | 4 | -24.1 | 2.5 | -22.1 | OSL | Quartz | 133.9 | 7.6<br>$\pm 2\sigma$ SE  |
| 474 | Yeon-ggwa | Baeksu 3   | 35.3032 | 126.3212 | ML  | 4 | -25.9 | 2.5 | -23.9 | OSL | Quartz | 124.0 | 7.8<br>$\pm 2\sigma$ SE  |
| 475 | Yeon-ggwa | Baeksu 4   | 35.3032 | 126.3212 | ML  | 4 | -27.2 | 2.5 | -25.2 | OSL | Quartz | 138.8 | 7.8<br>$\pm 2\sigma$ SE  |
| 476 | Yeon-ggwa | Baeksu 5   | 35.3032 | 126.3212 | ML  | 4 | -28.8 | 2.5 | -26.8 | OSL | Quartz | 128.7 | 7.9<br>$\pm 2\sigma$ SE  |
| 477 | Yeon-ggwa | Baeksu 6   | 35.3032 | 126.3212 | ML  | 4 | -30.3 | 2.5 | -28.3 | OSL | Quartz | 124.7 | 7.6<br>$\pm 2\sigma$ SE  |
| 478 | Yeon-ggwa | Baeksu 7   | 35.3032 | 126.3212 | ML  | 4 | -31.8 | 2.5 | -29.8 | OSL | Quartz | 118.8 | 7.0<br>$\pm 2\sigma$ SE  |
| 479 | Yeon-ggwa | Baeksu 8   | 35.3032 | 126.3212 | ML  | 4 | -33.3 | 2.5 | -31.3 | OSL | Quartz | 112.2 | 6.8<br>$\pm 2\sigma$ SE  |

|     |                       |                        |         |          |    |   |       |     |        |     |        |       |                          |
|-----|-----------------------|------------------------|---------|----------|----|---|-------|-----|--------|-----|--------|-------|--------------------------|
| 480 | Yeon<br>ggwa<br>ng    | Baeksu<br>9            | 35.3032 | 126.3212 | ML | 4 | -34.8 | 2.5 | -32.8  | OSL | Quartz | 113.4 | 7.1<br>$\pm 2\sigma$ SE  |
| 481 | Yeon<br>ggwa<br>ng    | Baeksu<br>10           | 35.3032 | 126.3212 | ML | 4 | -36.3 | 2.5 | -34.3  | OSL | Quartz | 118.2 | 7.4<br>$\pm 2\sigma$ SE  |
| 482 | Yeon<br>ggwa<br>ng    | Baeksu<br>11           | 35.3032 | 126.3212 | ML | 4 | -37.8 | 2.5 | -35.8  | OSL | Quartz | 112.6 | 6.9<br>$\pm 2\sigma$ SE  |
| 483 | Yeon<br>ggwa<br>ng    | Baeksu<br>12           | 35.3032 | 126.3212 | ML | 4 | -39.3 | 2.5 | -37.3  | OSL | Quartz | 113.1 | 7.3<br>$\pm 2\sigma$ SE  |
| 484 | Yeon<br>ggwa<br>ng    | Baeksu-<br>Duuri 1     | 35.2723 | 126.2845 | ML | 4 | -17.4 | 2.5 | -15.48 | OSL | Quartz | 107.7 | 6.7<br>$\pm 2\sigma$ SE  |
| 485 | Yeon<br>ggwa<br>ng    | Baeksu-<br>Duuri 2     | 35.2723 | 126.2845 | ML | 4 | -27.9 | 2.5 | -25.98 | OSL | Quartz | 122.1 | 7.2<br>$\pm 2\sigma$ SE  |
| 486 | Yeon<br>ggwa<br>ng    | Baeksu-<br>Duuri 3     | 35.2723 | 126.2845 | ML | 4 | -29.2 | 2.5 | -27.28 | OSL | Quartz | 126.2 | 8.1<br>$\pm 2\sigma$ SE  |
| 487 | Gocha<br>ng           | Dongho<br>1            | 35.4911 | 126.3678 | ML | 4 | -37.2 | 2.5 | -35.2  | OSL | Quartz | 107.5 | 7.6<br>$\pm 2\sigma$ SE  |
| 488 | Gocha<br>ng           | Dongho<br>2            | 35.4911 | 126.3678 | ML | 4 | -39.4 | 2.5 | -37.4  | OSL | Quartz | 107.6 | 7.3<br>$\pm 2\sigma$ SE  |
| 489 | Gocha<br>ng           | Dongho<br>3            | 35.4911 | 126.3678 | ML | 4 | -40.2 | 2.5 | -38.2  | OSL | Quartz | 113.3 | 7.2<br>$\pm 2\sigma$ SE  |
| 490 | Jindo                 | Jindo<br>shelf         | 34.1205 | 126.2188 | ML | 4 | -49.0 | 1.5 | -48.5  | OSL | Quartz | 124.4 | 10.0<br>$\pm 2\sigma$ SE |
| 491 | Heuks<br>an<br>Island | Heuksan<br>Mud<br>Belt | 34.1326 | 125.6823 | ML | 4 | -84.7 | 1.6 | -84    | OSL | Quartz | 125.1 | 9.9<br>$\pm 2\sigma$ SE  |

### 3.3.3.2 Paleo sea level calculated from beach and tidal deposits

Beach deposits and beach rock are also a reliable RSL marker because the formative zone is in close proximity to sea levels (Mauz et al., 2015). Five paleo RSLs of beach deposits (Landform Type 2 in Table 1) and an additional five paleo RSLs of beach rock (Landform Type 3 in Table 1) were used to determine paleo RSLs from LIG-aged deposits along the western and southern Korean coast. RSLs from beach rock were calculated using the following equations:

Paleo RSL at beach-deposit data points (Landform Type 2 in Table 1)

$$= E - RWL \pm \sqrt{E_e^2 + \left(\frac{ob - d_b}{2}\right)^2} = \sqrt{E_e^2 + \left(\frac{(0.2 * H_s + MHHW) - d_b}{2}\right)^2} \quad (9)$$

where (ob) represents the ordinary berm height, which was estimated using the average significant wave height over one year (H<sub>s</sub>) and MHHW represents the mean higher high water heights (Table 1; Mayer and Kriebel, 1994; Rovere et al., 2016). For beach rocks, we used a similar expression:

Paleo RSL at beach-rock data points (Landform Type 3 in Table 1)

$$= E - \text{RWL} \pm \sqrt{E_e^2 + \left(\frac{sz - d_b}{2}\right)^2} = \sqrt{E_e^2 + \left(\frac{2 * (0.2 * H_s + MHHW) - d_b}{2}\right)^2} \quad (10)$$

where (sz) represents the elevation of the top of the spray zone, which was calculated using the average significant wave height over one year (H<sub>s</sub>) (Table 1; Rovere et al., 2016).

Twenty-two OSL-dated clastic tidal-flat deposits from nearshore cores were also used to estimate paleo RSLs based on Eq. (11).

Paleo RSL at tidal-flat clastic data points (Landform Type 4 in Table 1)

$$= E - \text{RWL} \pm \sqrt{E_e^2 + \left(\frac{sz - (MLLW + d_b)}{2}\right)^2} = \sqrt{E_e^2 + \left(\frac{2 * (0.2 * H_s + MHHW) - (MLLW + d_b)}{2}\right)^2} \quad (11)$$

where MLLW represents mean lower low water heights (Table 1).

#### 4 Relative Sea-level Indicators

In the following sections, we discuss each characteristic of the RSL indicators from the Korean Peninsula, identified by their ‘WALIS RSL ID’ in the text, which have been entered into the WALIS database. The ID number corresponds with the WALIS database identification numbers. Similarly, we use ‘WALIS LUM ID’ followed by a number to reference an optically stimulated luminescence (LUM) age within the database.

The east coast of the southern Korean Peninsula was divided into two regions, a northern and a southern region, based on latitude. The northern region encompasses the area from Gangneung through Uljin and the Yeongdeok area (38°N to 36.3°N) while the southern region encompasses the region between Pohang and **Ulju** (36.3°N to 35°N) (Fig. 2). Along the west and southwest coast of the southern Korean Peninsula, the sea-level data and indicators were divided into two groups, those found onshore and those found within the nearshore.

#### 4.1 Marine terraces along the northern east coast

##### 4.1.1 Gangneung area

Two areas have been studied within the Gangneung area: Gangneung-Saemokee and Gangneung-Anin (Fig. 2). The marine deposits overlying the paleo wave-cut platform of the marine terrace at Gangneung-Saemokee are found 27~31 m above MSL and contain rounded cobbles and some sand deposits of paleo beach origin (S.C. Hong, 2014). At Subsite Gangneung-Saemokee, two quartz OSL ages were interpreted as minimum ages of >85 ka and >92 ka. These deposits appear to exceed

the upper age limit of the methodology because the signal is saturated (e.g., Rhodes, 2011). Fortunately, two IRSL ages of 128.3±24.5 ka (WALIS LUM ID #432) and 124.1±25.3 ka (WALIS LUM ID #433) and one cobble surface OSL age of 133.7±13.9 ka (WALIS LUM ID #434) were obtained from these terrace deposits (Table 3; S.C. Hong, 2014). Using Eq. (8),  
300 the paleo RSLs of these samples without a PWPE yielded 26.9±2.2 m, 26.9±2.2 m, and 25.9±2.2 m above MSL, respectively (Table 3; WALIS RSL ID #4009, 4010).

Gangneung-Anin is located 23 m above MSL and consists of beach sand and gravel deposits overlying a paleo wave-cut platform. The two ages from the beach sand were 117±6 ka (WALIS LUM ID #435) and 129±8 ka (WALIS LUM ID #436) (Table 3; S.Y. Lee et al., 2015). At this site, although the paleo shoreline angle elevation is unknown, we estimated the SA  
305 elevation to be approximately 27.5±2.5 m above MSL using a value of 25 m for PWPE and 30 m for PSOE in Eqs. (1) and (2) (Table 2; Fig. 6).

#### 4.1.2 Donghae area

Donghae-Eodal-dong is located 26 m above MSL (Fig. 2) and consists of beach sand and pebble deposits overlying a paleo wave-cut platform. The three samples from the beach sand were analyzed using paired OSL and IRSL methods. The three  
310 OSL/IRSL age sets from the beach sand were 126.1±10.1 ka (OSL, WALIS LUM ID #492) and 127.5±24.6 ka (IRSL, WALIS LUM ID #437), 128±14 ka (OSL, WALIS LUM ID #438) and 124.1±23.7 ka (IRSL, WALIS LUM ID #439), and 112.1±7.7 ka (OSL, WALIS LUM ID #440) and 125.3±24 ka (IRSL, WALIS LUM ID #441) (Table 3; S.C. Hong, 2014). Using Eq. (8), the paleo RSLs of these samples without a PWPE yielded 27.4±2.2 m, 26.4±2.2 m, and 25.4±2.2 m above MSL, respectively (Table 3; WALIS RSL ID #4012, 4014, 4015). At this site, the paleo shoreline angle elevation is estimated to be 28±2 m above  
315 MSL using 26 m for PWPE and 30 m for PSOE (Table 2; Fig. 6).

#### 4.1.3 Uljin area

Subsite Uljin-Hujeong is located 30~34 m above MSL (Fig. 2) and is comprised of moderately well-sorted sand (>5 m thick) with a mean grain size of ~ 1.3 φ overlying a paleo wave-cut platform (J.W. Kim et al., 2007b). The two OSL ages from the sand deposits were 119±15 ka (WALIS LUM ID #442) and 111±9 ka (WALIS LUM ID #443) (Table 3; J.W. Kim et al.,  
320 2007b). Without a PWPE we estimated RSL using Eq. (8) based on its use as a beach RSL indicator (Landform Type 1 in Table 1). For that calculation, we arrive at RSL estimates of 28.2±1.7 m and 32.2±1.7 m, respectively (Table 3; WALIS RSL ID #4016, 4017).

#### 4.1.4 Youngduk area

Subsite Youngdeok-Geumgok-ri is located 20-25 m above MSL and contains rounded cobbles, pebbles, and sand deposits  
325 overlying a paleo wave-cut platform (Figs. 2, 3; S.C. Hong, 2014). Two OSL ages from quartz sand in the overlying marine deposits were interpreted as minimum ages of >44 ka and >41 ka. They appear to exceed the upper age limit of the methodology in these sediments as the traps are saturated (e.g., Rhodes, 2011). Two additional IRSL ages of 124.5±25.3 ka

(WALIS LUM ID #444) and  $122.1 \pm 24.9$  ka (WALIS LUM ID #445) were obtained from the sand deposits (Table 3; S.C. Hong, 2014). Without a PWPE we estimated RSL using Eq. (8) based on its use as a beach RSL indicator (Landform Type 1 in Table 1). For that calculation, we arrived at RSL estimates of  $19.4 \pm 1.7$  m and  $22.1 \pm 1.7$  m, respectively (Table 3; WALIS RSL ID #4018, 4019).

## 4.2 Marine terraces along the southern east coast

### 4.2.1 Pohang area

This area comprises six subsites at Pohang-Josa-ri, Pohang-Ohdo-ri, Pohang-Yonghan-1 (silica mine), Pohang-Yonghan-2, Pohang-Masan-ri, and Pohang-Hajeong-ri (Fig. 2). Subsite Pohang-Josa-ri is located 22 m above MSL and contains alternating beds (~1.5 m thick) of sand and silt overlying a paleo wave-cut platform (G.Y. Lee and Park, 2019b). The single OSL age from the sand deposits was  $116 \pm 8$  ka (WALIS LUM ID #446) (G.Y. Lee and Park, 2019b, 2020). Subsite Pohang-Ohdo-ri is located on a marine terrace 25.2 m above MSL and consists of well-rounded cobbles, pebbles, and sand (>3 m thick) (G.Y. Lee and Park, 2019b). The single OSL age from the sand deposits was  $137 \pm 9$  ka (WALIS LUM ID #447) (Table 3; G.Y. Lee and Park, 2019b, 2020). Treating the deposits as beach sands overlying marine terraces without a PWPE and using Eq. (8) we arrived at RSL estimates of  $20.2 \pm 1.7$  m and  $23.4 \pm 1.7$  m for subsites Pohang-Josa-ri and Pohang-Ohdo-ri, respectively (Table 3; WALIS RSL ID #4020, 4021).

Subsite Pohang-Yonghan-1 (silica mine) is located on a marine terrace 32 m above MSL and contains alternating well-rounded pebble and sand beds (~1.2 m thick) (J.W. Kim et al., 2005a). A single OSL age of  $123 \pm 9$  ka (WALIS LUM ID #448) was obtained from the sand deposits (J.W. Kim et al., 2005a). The paleo RSLs of this sample yielded  $30.2 \pm 1.7$  m above MSL using Eq. (8) (Table 3; WALIS RSL ID #4022).

Subsite Pohang-Yonghan-2 is located on top of a marine terrace 35 m above MSL and contains alternating paleo-beach beds (~0.5 m thick) of well-rounded pebble and sand overlain by aeolian sand beds (~8 m thick) (Fig. 4; J.H. Choi et al., 2009). The two ages from the paleo-beach sand sediments were  $114 \pm 7$  ka (WALIS LUM ID #449) and  $127 \pm 12$  ka (WALIS LUM ID #450) (Table 3; J.H. Choi et al., 2009). Using Eq. (8), the paleo RSLs of these samples without a PWPE yielded  $33.2 \pm 1.7$  m above MSL (Table 3; WALIS RSL ID #4024). The overlying aeolian sand beds returned younger OSL ages of  $104 \pm 6$  ka,  $108 \pm 6$  ka,  $92 \pm 6$  ka, and  $64 \pm 6$  ka (not included in WALIS) in ascending stratigraphic order (Fig. 4; J.H. Choi et al., 2009). The elevation of the LIG shoreline angle is 35 m above MSL (Table 2; Fig. 4; J.H. Choi et al., 2009).

Subsite Pohang-Masan-ri is located 23 m above MSL and contains paleo-beach sand beds (~0.24 m thick) and overlying aeolian sand beds (~5 m thick) above a paleo wave-cut platform (J.W. Kim et al., 2005b). The significance of the terraces in this region is also discussed by Thompson and Creveling (2021) who focus more on the MIS 5c and MIS 5a ages from this site and adjacent areas. The four ages from the paleo-beach sand sediments were  $119 \pm 8$  ka (WALIS LUM ID #451),  $111 \pm 5$  ka (WALIS LUM ID #452),  $116 \pm 7$  ka (WALIS LUM ID #453), and  $107 \pm 8$  ka (WALIS LUM ID #454) (Table 3; J.W. Kim et al., 2005b). Using Eq. (8), the paleo RSLs of these samples without a PWPE yielded  $21.2 \pm 1.7$  m above MSL (Table 3; WALIS



360 RSL ID #4025). A total of 158 sediment samples were also collected almost continuously from approximately 3.8 m of the Masanri (MS) outcrop section for a paleomagnetic study (Shim, 2006). Remanent magnetic moment, alternating field demagnetization, anhysteretic/isothermal remanent magnetization, and magnetic susceptibility of each sample were measured to isolate characteristic remanent magnetization (Shim, 2006). The global Blake Excursion Event was discovered in the MS section on the Masan-ri marine terrace in the northern Pohang area (Fig. 2). The elevation of this outcrop section is 22 m above  
365 MSL. Considering the Blake Event (111.8 to 117.1 ka), the paleomagnetic age of the paleo-beach sediments overlying the marine terrace suggests a **numerical** age of  $117.6 \pm 2.7$  ka with an error range of between 114.9 and 120.2 ka (Table 3; Shim, 2006). At this site, **the shoreline angle elevation is estimated to be  $23.5 \pm 1.5$  m above MSL** using 22 m for PWPE and 25 m for PSOE (Table 2; Fig. 6).

Subsite Pohang-Hajeong-ri is located 35 m above MSL, and the section crops out in the footwall of the Hajeong fault. The  
370 section contains a wedge-shaped mix (98 to 20 cm thick) of rounded pebbles, sand, and angular alluvial pebbles overlying a marine terrace (S.J. Choi, 2016). The single OSL age from the sand was  $128 \pm 12$  ka (WALIS LUM ID #455) (Table 3; S.J. Choi, 2016), which is interpreted as a terrestrial limiting data point.

#### 4.2.2 Gyeongju area

Subsite Gyeongju-Jinri is located on a marine terrace 36 m above MSL (Fig. 2) and contains thin (~ 15 cm thick) paleo-beach  
375 gravels underlying fine-grained sand beds (~0.5 m thick) (J.W. Kim et al., 2007a). The two OSL ages from the sand deposits were  $116 \pm 6$  ka (WALIS LUM ID #456) and  $126 \pm 10$  ka (WALIS LUM ID #457) (Table 3; J.W. Kim et al., 2007a). Using Eq. (8), the paleo RSLs of these samples without a PWPE yielded  $32.3 \pm 2.6$  m above MSL (Table 3; WALIS RSL ID #4027). In this area, a land seismic survey was conducted to identify the elevation of the buried paleo wave-cut platform and shoreline angle. Based on seismic velocities of 600 m/s for the overlying deposits and 2100 m/s for the wave-cut platform, the elevation  
380 of the paleo wave-cut platform ranges from 27 to 29 m above MSL with a slope of  $1.5^\circ$  (Fig. 5; J.W. Kim et al., 2007a). The shoreline angle elevation **is estimated to be  $28 \pm 1$  m above MSL** (Table 2).

#### 4.2.3 Ulsan area

Subsite Ulsan-Jeongja-ri is located 19~28 m above MSL and contains a lower unit of fluvial beds (~2 m thick), a middle unit of fluvial/beach transitional beds (<1 m thick), and an upper unit of paleo-beach beds (~1 m thick) containing pebbles and  
385 sand overlying a paleo wave-cut platform (S.J. Choi et al., 2008). These terrace deposits are overlain by alternating alluvial beds (>2 m thick) of gravel, sand, and mud (S.J. Choi et al., 2008). The single OSL age from the sand deposits was  $113 \pm 39$  ka (WALIS LUM ID #459) (Table 3; S.J. Choi et al., 2008). Treating the sands as a beach deposit using Eq. (8) gives an RSL estimate of  $18.8 \pm 2.6$  m (Table 3; WALIS RSL ID #4028).

#### 4.2.4 Ulju area

390 Subsite Ulju-Weseong contains well-sorted beach sand on a marine terrace at an elevation of 14 m above MSL (Fig. 2; J.H. Choi, 2004). The sand deposit was dated to  $112\pm 7$  ka (WALIS LUM ID #458) (Table 3; J.H. Choi et al., 2003; J.H. Choi, 2004). Using Eq. (8), the paleo RSLs of these samples without a PWPE yielded  $10.3\pm 2.6$  m above MSL (Table 3; WALIS RSL ID #4029). Thompson and Creveling (2021) discuss the sea-level significance of this site and adjacent areas in their summary of MIS5c and MIS5a sea levels.

395

### **4.3 Paleo-shoreline deposits between the east and west coasts**

#### **4.3.1 Sacheon area**

The Sacheon area is located in the south-facing Korean Peninsula straddling the eastern and western coasts (Fig. 2). Subsite Sacheon-Daepo-dong lies at  $\sim 6$  m above MSL and unlike the LIG shorelines of the eastern Korean Peninsula is not marked by a distinctive marine terrace geomorphology (J.Y. Shin and Hong, 2018). The paleo-shoreline deposits (2-3.5 m thick) are characterized by clast-supported well-rounded cobble and pebble deposits with little to no matrix. Their sedimentary characteristics are similar to the sandy gravel bars of the modern upper tidal flats in the region (J.Y. Shin and Hong, 2018). Two OSL rock-surface ages obtained from cobbles were  $111.2\pm 16.0$  ka (WALIS LUM ID #460) and  $102.5\pm 14.7$  ka (WALIS LUM ID #461) (Table 3; J.Y. Shin and Hong, 2018). Based on Eq. (9), we arrive at a RSL estimate of  $6.0\pm 0.8$  m (Table 3; WALIS RSL ID #4030).

405

#### **4.4 Onshore paleo-beach and terrestrial deposits of the west coast**

##### **4.4.1 Wando area**

Subsite Wando-Sinji has two localities at approximately 3 m and 6 m above MSL (G.R. Lee and Park, 2018; W.J. Shin et al., 2019). At the 3 m site, a 0.3 to 1 m thick shell-bearing sand with well-rounded pebbles and cobbles is interpreted to represent a paleo-beach deposit. Its sedimentary facies is similar to the modern sandy gravel tidal-beach or intertidal deposits of the modern upper tidal flats of the region (W.J. Shin et al., 2019). The five OSL ages acquired from the deposits at 2.55, 2.80, 3.50, 4.25, and 4.50 m above MSL were  $157.4\pm 18.9$ ,  $127.5\pm 8.5$ ,  $115.9\pm 9.7$ ,  $23.2\pm 1.2$ , and  $6.2\pm 0.4$  ka, respectively (W.J. Shin et al., 2019). Only the two MIS 5e ages of  $127.5\pm 8.5$  ka (WALIS LUM ID #462) and  $115.9\pm 9.7$  ka (WALIS LUM ID #463) were included in the WALIS database (Table 3; W.J. Shin et al., 2019). Based on Eq. (9), we arrive at a RSL estimate of  $2.5\pm 0.9$  m and  $3.2\pm 0.9$  m (Table 3; WALIS RSL ID #4031).

415

At the 6 m locality, 4 m of sand and well-rounded cobbles and boulders are thought to represent a paleo-beach deposit (G.R. Lee and Park, 2018). The single age from the sand deposits was  $108\pm 18$  ka (WALIS LUM ID #464) (Table 3; G.R. Lee and Park, 2018, 2019a). Based on Eq. (9), we arrive at a RSL estimate of  $5.8\pm 0.9$  m (Table 3; WALIS RSL ID #4032).

##### **4.4.2 Haenam area**

420 Subsite Haenam-Ijin-ri is located 4-8 m above MSL and is comprised of sandy and clayey silt beds with granules and pebbles  
(D.Y. Yang et al., 2016). The gravel is a mixture of rounded to sub-angular clasts. These deposits were originally interpreted  
as marine sediments within a marine terrace, based on chemical analysis of the clay minerals (D.Y. Yang et al., 2016). However,  
no distinctive sedimentological or geomorphologic characteristics of the deposit suggest a marine origin. On the contrary, the  
poorly sorted sandy/clayey silt deposits with dispersed gravels look like overwash deposits in a backshore or alluvial setting  
425 behind the shoreline (e.g., J.Y. Lee et al., 2013; K.H. Choi et al., 2014). Four OSL ages acquired from the deposits at 4.95,  
5.41, 6.49, and 7.51 m above MSL in the outcrop were dated as  $152\pm 11$  (not included in WALIS),  $128\pm 9$ ,  $128\pm 10$ , and  $121\pm 10$   
ka, respectively (D.Y. Yang et al., 2016). The three MIS 5e ages from the fine-grained silt sediments of  $128\pm 9$  ka (WALIS  
LUM ID #467),  $128\pm 10$  ka (WALIS LUM ID #466), and  $121\pm 10$  ka (WALIS LUM ID #465) (Table 3; D.Y. Yang et al., 2016)  
are included in the WALIS database and interpreted as terrestrial limiting records of  $4.3\pm 1.3$ ,  $5.3\pm 1.3$ , and  $6.4\pm 1.3$  m,  
430 respectively (Table 3).

#### 4.4.3 Buan area

The Buan area on the west coast of the Korean Peninsula (Fig. 7) has two localities, Buan-Daehang-ri and Buan-Mapo-ri,  
located 11 m and 9 m above MSL, respectively (G.R. Lee and Park, 2018). At the two localities, the outcrop exposes a mixture  
of silt, sand, and well-rounded pebbles and cobbles, approximately 2 m thick (G.R. Lee and Park, 2018). These deposits were  
435 originally interpreted as alluvial or marine sediments (G.R. Lee and Park, 2018) with little distinctive sedimentological or  
geomorphologic evidence for a marine origin. The two OSL ages from the sandy sediments were  $112\pm 24$  ka (WALIS LUM  
ID #468) and  $130\pm 20$  ka (WALIS LUM ID #469) (Table 3; G.R. Lee and Park, 2018, 2019a), which are interpreted as terrestrial  
limiting records.

#### 4.5 Paleo-intertidal and nearshore deposits of the west coast

##### 440 4.5.1 Seocheon area

Core DSR-C03 was collected onshore of a modern high-tide beach near Seocheon on the west coast of the Korean Peninsula  
(Fig. 7; Chang et al., 2017). MIS 5e deposits occur lower than about 1.5 m below MSL (Fig. 9). These occurrences of LIG  
deposits at approximately -1.5 m in elevation are the shallowest LIG deposits found in the core sediments acquired on the west  
coast of the Korean Peninsula. Four depositional units labeled as Units A, B1, B2, and C, in ascending stratigraphic order,  
445 were identified based on sediment texture and structures (Figs. 9, 10).

##### 4.5.1.1 Unit A

The lowermost Unit A is mud-rich with sandy beds showing an overall coarsening-upward trend and attains a thickness of up  
to 12.5 m in core DSR-C03 (Fig. 9). This unit is comprised of lower muddy beds and upper more sandy beds (Fig. 9), both of  
which contain tidal couplets of mud and sand (Fig. 10D, E). The lower muddy beds are characterized by intense bioturbation,

450 no shell or rare shell fragments, and lenticular to wavy tidal bedding, while the upper more sandy beds show moderate bioturbation, few shell fragments, and flaser to wavy and lenticular tidal bedding. Considering the presence of mud-sand tidal bedding and muddy nature of the sediments with no shell or rare shell fragments, the lower muddy beds are interpreted as being deposited in upper mud-flat or salt-marsh environments (e.g., Klein, 1985; Dalrymple et al., 1992; Dalrymple, 2010). The upper moderately bioturbated more sandy beds are suggestive of being deposited in an intertidal mixed-flat environment.

455 The uppermost part of Unit A resembles the pre-Holocene semi-consolidated oxidized beds commonly occurring on top of tidal-flat sequences throughout the west coast of Korea (e.g., Y.H. Kim et al., 1999; Lim et al. 2004; H.H. Yoon et al., 2021). The two OSL ages of  $116 \pm 10$  ka and  $108 \pm 8$  ka suggest that the tidal deposit formed during the MIS 5 period (Table 3; Fig. 9; e.g., Chang et al. 2014; Baek et al. 2017; H.H. Yoon et al., 2021).

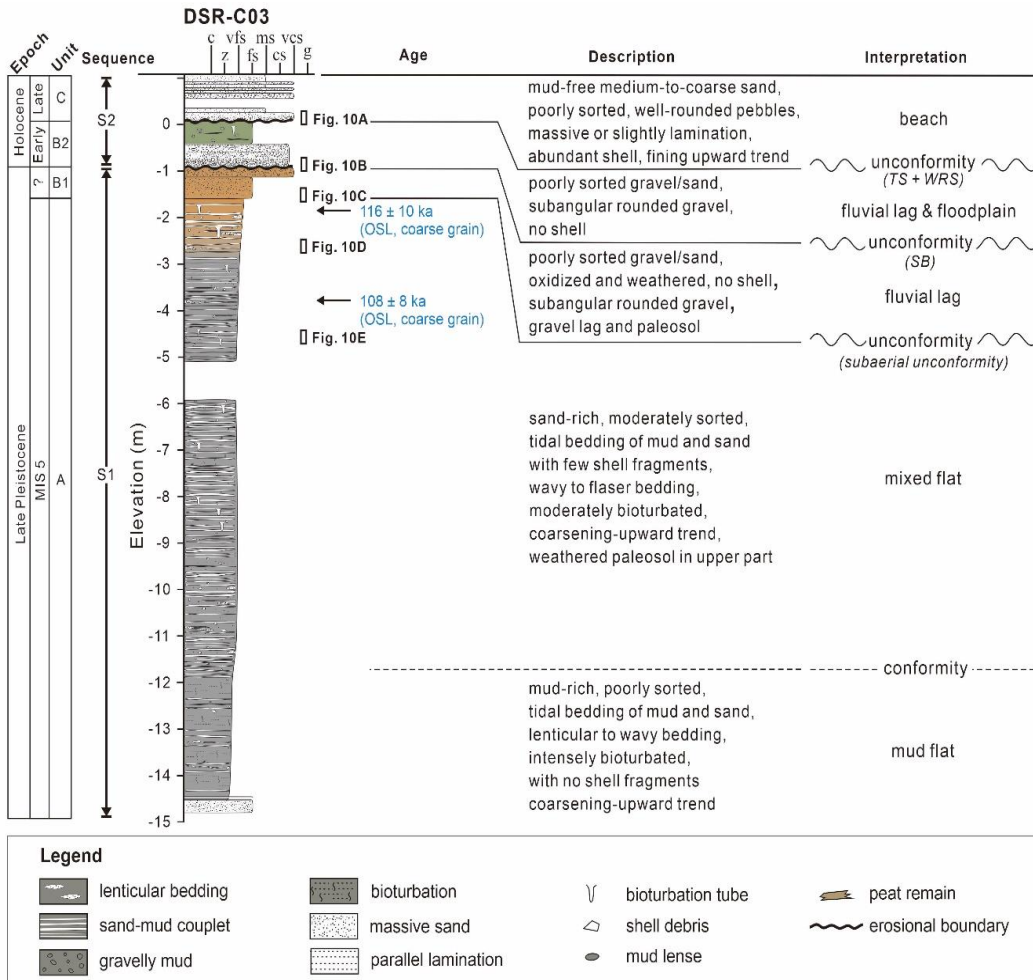

460

**Figure 9: Schematic columnar section of core DSR-C03 including lithology and OSL ages (cf. Chang et al., 2017). Age data are found in Table 3. For the location of the core, see Fig. 7. TS: Transgressive Surface, WRS: Wave Ravinement Surface, SB: Sequence Boundary**

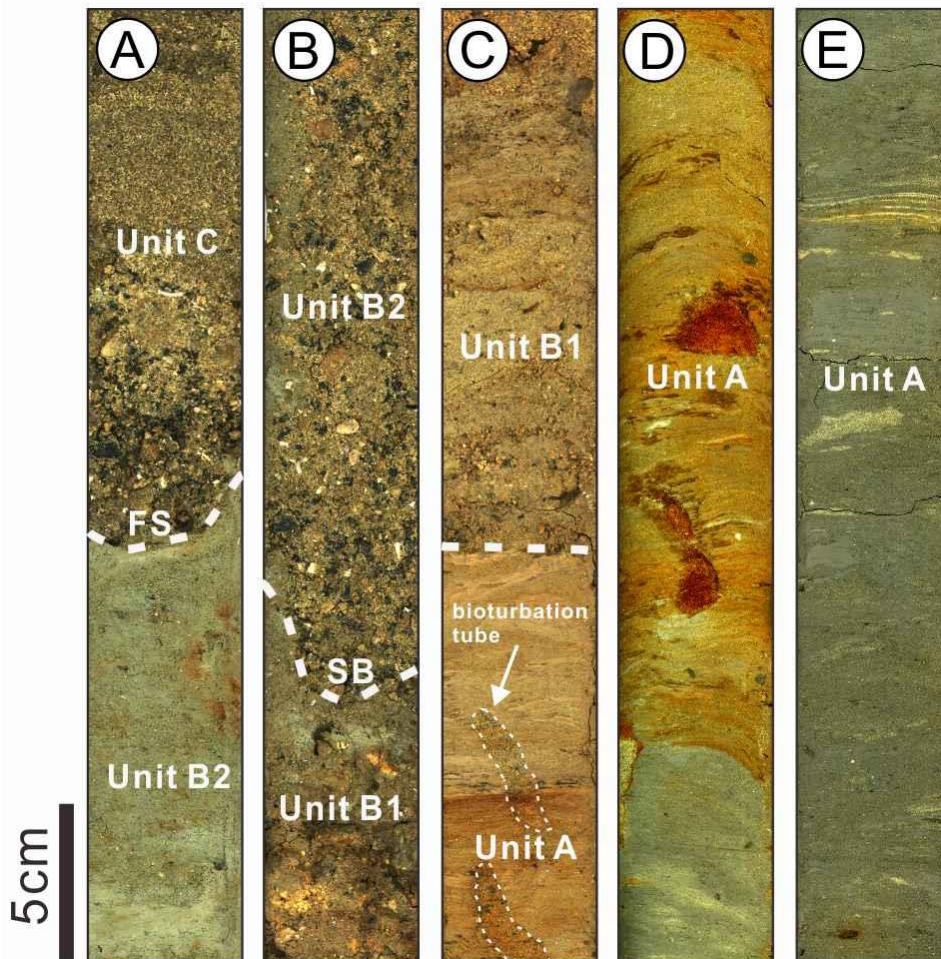

465

470

**Figure 10: Selected photographs of sediments in core DSR-C03 in Fig. 9. (a) Massive mud-free sand beds with laminated sand, pebble, shell-rich layers (Unit C). (b) Muddy coarse-grained sediments with weakly oxidized poorly sorted gravel and sand (Unit B2). (c) Completely oxidized poorly sorted gravel and sand without muddy sediments (Unit B1). (d, e) Moderately bioturbated, laminated, sandy mud and muddy sand with moderate flaser, wavy to lenticular bedding and rhythmic lamination (Unit A). The oxidized upper part of Unit A is reddish while the lower part has a gray color. TRS: Transgressive Ravinement Surface, SB: Sequence Boundary**

475

Two OSL ages were obtained from Unit A in core DSR-C03. The one MIS 5e OSL age obtained from a coarse quartz sand bed was  $116 \pm 10$  ka (WALIS LUM ID #470) at -3.01 m below MSL. Another MIS 5e/5c OSL age of  $108 \pm 8$  ka (WALIS LUM ID #471) was obtained at a core depth of -4.95 m below MSL (Table 3; Chang et al., 2017). The shallowest occurrence of LIG deposits in Unit A represents the highest among marine limiting records of LIG RSL.

OSL-dated clastic tidal-flat deposits were used as paleo RSL markers, identified based on sediment texture and sedimentary structures, and interpreted as tidal environments (e.g., Mauz and Bungenstock, 2007). Although some interpretations are of



salt-marsh deposits or intertidal mixed-flat deposits, no microfaunal work has been conducted on the deposits to confirm their  
480 marsh and mixed-flat interpretations and thus tightly constrained relationship with paleo-sea levels as is normally done in other  
salt-marsh or intertidal based RSL studies (e.g., Shennan et al., 2015). Thus the tidal-flat data points are treated as marine  
limiting records because their relationship to past tidal-datums is not constrained by biological indicators.

#### 4.5.1.2 Unit B

Unit B is approximately 2 m thick and is separated from the underlying Unit A by a distinct erosional boundary (Figs. 9, 10C).  
485 This unit can be further subdivided into two subunits: the lower unit B1 consists of completely oxidized gravel and sand devoid  
of muddy sediments and the upper unit B2 contains muddy sediments with less oxidized gravel and sand sediments compared  
to unit B1. The sediments are composed of poorly sorted gravel and coarse sand (Fig. 10B, C). These units contain neither  
shells, foraminifers nor any other marine indicators. Muddy deposits of Unit B2 are commonly associated with coarser sand  
layers and contain wood fragments, fine peat, and rootlets. The erosional unconformities at the base of Units B1 and B2 and  
490 the presence of oxidized sediments point to an extended period of subaerial exposure. The contact is interpreted as a sequence  
boundary (Figs. 9, 10B). The coarse-grained sediments without a muddy matrix probably originated from gravel bars or  
channel lag deposits in a fluvial environment (e.g., K. Choi and Kim 2006; Chang et al. 2014; Baek et al. 2017).

#### 4.5.1.3 Unit C

Unit C is characterized by an upper massive sand bed and a lower crudely stratified sand bed showing a fining-upward trend  
495 (Fig. 9). The sand beds are mud-free and contain shell-rich beds (Fig. 10A). The upper sand beds are a few decimeters thick,  
structureless, and comprised of very poorly sorted medium to coarse yellowish sand. The lower crudely stratified sand beds  
contain granules and pebbles (Fig. 10A). These characteristics suggest a swash deposit in the beach face. Unit C rests on a  
sharp erosional boundary separating it from the underlying sand/mud deposits of Unit B2 (Figs. 9, 10A). The erosional  
boundary is interpreted as a transgressive ravinement surface, formed by landward shoreface retreat and wave action in a  
500 shoreline during transgression and thus these deposits likely post-date the last glacial maximum (Fig. 9).

#### 4.5.2 Younggwang area

Two cores were obtained on a modern tidal flat at Baeksu and Baeksu-Duuri near Younggwang (Fig. 7; Chang et al., 2014;  
Baek et al., 2017). Core 11YG-C4 at Baeksu has approximately 18 m of LIG deposits between -38 and -20 m below MSL (Fig.  
11). The LIG deposit is characterized by tidal rhythmites, sand-mud couplets, and a lower stiff tidal mud with fine peats,  
505 rootlets, and wood fragments (Chang et al., 2014). The characteristics of the presumed LIG deposit are indicative of deposition  
within a tidal mud-flat and salt-marsh environment (Chang et al., 2014). The twelve LIG ages from 4-11  $\mu\text{m}$  quartz grains  
were 110.0 $\pm$ 6.6 ka (WALIS LUM ID #472) at -20.8 m in elevation, 133.9 $\pm$ 7.6 ka (WALIS LUM ID #473) at -22.1, 124.0 $\pm$ 7.8  
ka (WALIS LUM ID #474) at -23.9 m, 138.8 $\pm$ 7.8 ka (WALIS LUM ID #475) at -25.2 m, 128.7 $\pm$ 7.9 ka (WALIS LUM ID  
#476) at -26.8 m, 124.7 $\pm$ 7.6 ka (WALIS LUM ID #477) at -28.3 m, 118.8 $\pm$ 7.0 ka (WALIS LUM ID #478) at -29.8 m,

510 112.2±6.8 ka (WALIS LUM ID #479) at -31.3 m, 113.4±7.1 ka (WALIS LUM ID #480) at -32.8 m, 118.2±7.4 ka (WALIS LUM ID #481) at -34.3 m, 112.6±6.9 ka (WALIS LUM ID #482) at -35.8 m, and 113.1±7.3 ka (WALIS LUM ID #483) at -37.3 m in elevation (Table 3; Chang et al. 2014). These occurrences suggest marine limiting records of LIG RSL.

In core 11YG-C01 from Baeksu-Duuri, LIG deposits occur between -31 and -19 m below MSL (Fig. 11). The LIG deposits attain a thickness up to approximately 12 m in the core and are characterized by tidal rhythmites, sand-mud couplets, a massive sand bed, and a fully bioturbated bed representative of tidal mud-flat and salt-marsh environments (Baek et al., 2017). It also contains shell beds, a lower stiff silt, mottled mud, partly deformed mud, fine peats, and wood fragments (Baek et al., 2017). The three LIG ages from the fine quartz were 107.7±6.7 ka (WALIS LUM ID #484) at -15.5 m in elevation, 122.1±7.2 ka (WALIS LUM ID #485) at -26.0, and 126.2±8.1 ka (WALIS LUM ID #486) at -27.3 m in elevation (Table 3; Baek et al., 2017), suggesting marine limiting records of LIG RSL.

#### 520 4.5.3 Gochang area

Core 15DH-C03 in the Gochang area was obtained from the modern nearshore environment and contains LIG deposits between -32 and -39 m below MSL (Figs. 7, 8; H.H. Yoon et al., 2021). The LIG deposit attains a thickness of up to ~7 m in the core, which is characterized by muddy beds containing no shell or rare shell fragments (Fig. 11; H.H. Yoon et al., 2021). Sediments in the lower part of the core mainly consist of laminated mud beds with some mud-sand couplets or lenticular bedding. The sediments contain a few bioturbated beds. Sediments in the upper part of the core are largely mottled, intensely bioturbated, and composed dominantly of silty mud. The sediments contain some dark-gray organic-rich beds with wood fragments. Based on the presence of mud-sand couplets and lenticular bedding, the lower laminated mud beds are interpreted as being deposited in an upper mudflat environment (H.H. Yoon et al., 2021). The upper bioturbated mud with some organic material suggests deposition within a tidal salt-marsh environment (H.H. Yoon et al., 2021). The presence of tidal mud-sand couplets and ages between MIS 5e and 5d suggests that the tidal deposit formed during or shortly after the LIG period (e.g., Chang et al. 2014; Baek et al. 2017).

The three MIS 5 ages from 4-11 µm quartz grains were 107.5±7.6 ka (WALIS LUM ID #487) at -35.2 m below MSL, 107.6±7.3 ka (WALIS LUM ID #488) at -37.4 m below MSL, and 113.3±7.2 ka (WALIS LUM ID #489) at -38.2 m below MSL (Table 3; H.H. Yoon et al., 2021), suggesting marine limiting records of LIG RSL.

#### 535 4.5.4 Jindo area

Core H-C11 was obtained from the region offshore and south of Jindo (Fig. 7). A LIG age was obtained from sediments at an elevation of -48.5 m (S.H. Hong et al., 2019). This massive sandy shell bed was interpreted as a shelf deposit, based on the presence of *swaley cross strata* and abundant oyster fragments (Fig. 11; S.H. Hong et al., 2019). The single LIG age from 4-11 µm quartz grains was 124.4±10.0 ka (WALIS LUM ID #490) at an elevation of -48.5 m (Table 3; S.H. Hong et al., 2019). This deposit provides a marine limiting record of LIG RSL.

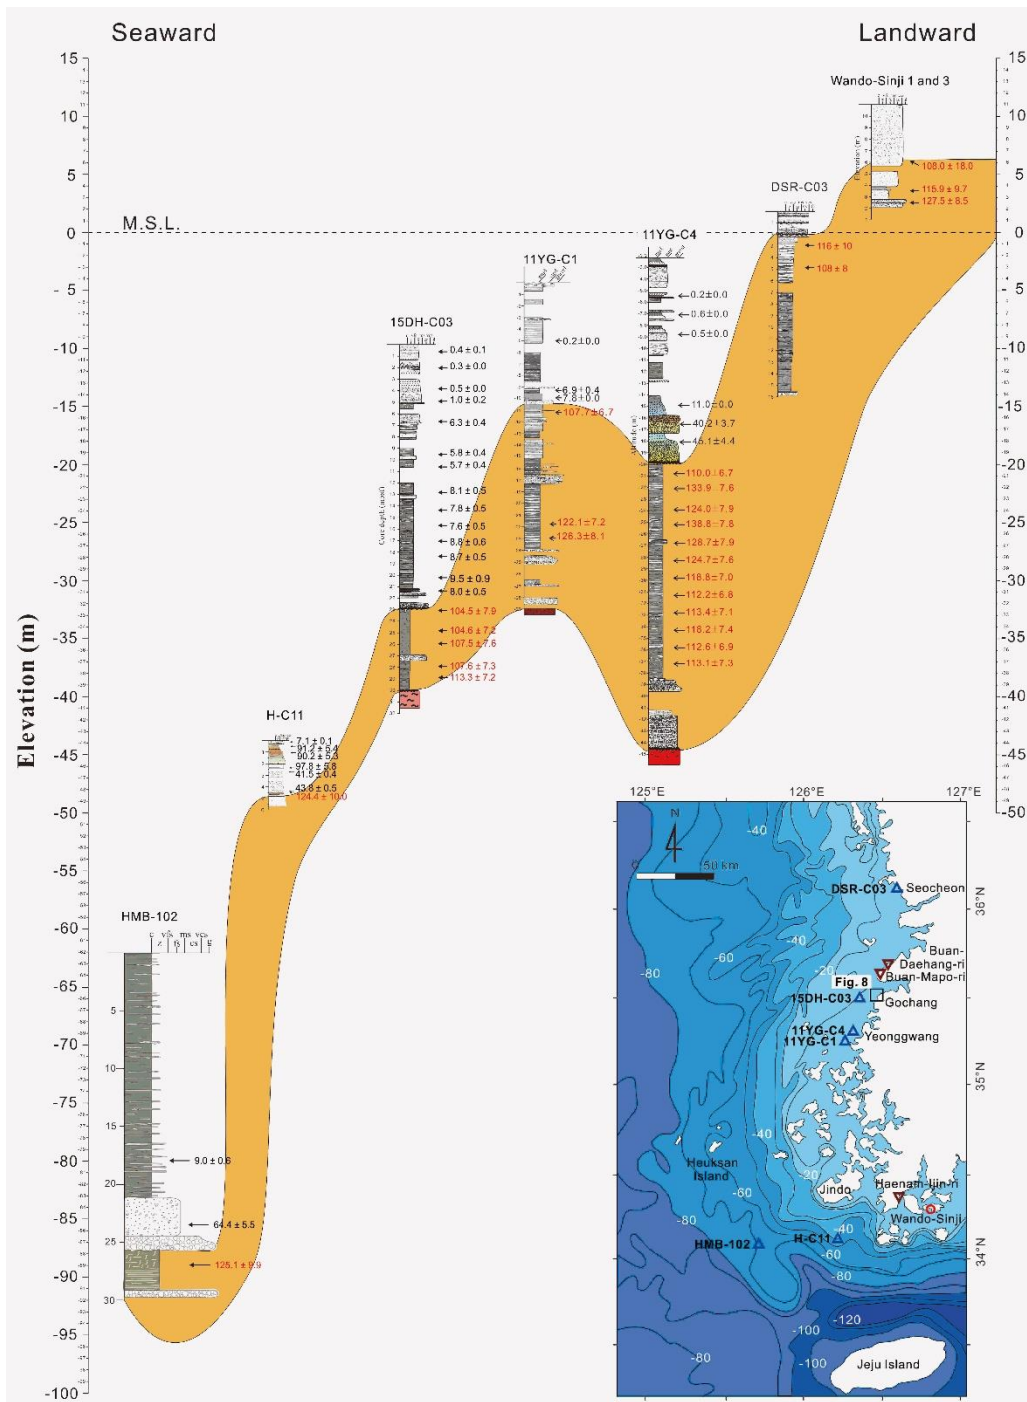

Figure 11: Onshore sections (Wando-Sinji 1 and 3) and tidal-to-nearshore cores (DSR-C03 to HMB-102) along the west coast of Korea plotted with respect to elevation of the remnant LIG deposits. Orange shading highlights the correlation of LIG deposits across the 6 coastal cores and Wando outcrop sections. Ages in red indicate LIG ages (WALIS LUM ID #470 to #491 in Table 3). For location, see Fig. 7.



#### 4.5.5 Heuksan Mud Belt area

Core HMB-102 of the Heuksan Mud Belt was obtained from the modern offshore environment (Fig. 7). One LIG age in the core was obtained at -84 m from a tidal deposit of laminated silt and clay and mottled mud (Fig. 11; Chang and Ha, 2015). The single LIG age from 4-11  $\mu\text{m}$  quartz grains was  $125.1 \pm 9.9$  ka (WALIS LUM ID #491) at an elevation of -84 m (Table 3; J. C. Kim et al., 2019). This deposit represents a marine limiting record of LIG RSL.

### 5. Related sea-level topics

#### 5.1 Uplift

The seismic stratigraphy and geology of the Gangneung and Donghae areas of the east coast of South Korea were summarized by Kwon et al. (2009) and Ryang et al. (2014). Intense compressional deformation during the early Pliocene, accompanied by the formation of reverse faults, strike-slip faults, and anticlinal folds, occurred mainly along the western margin of the submerged South Korea Plateau of the East Sea (Fig. 12; Ryang et al., 2007; Kwon et al., 2009). This deformation resulted in partial uplift and erosion of Late Pliocene and Early Quaternary deposits (Fig. 13). The lower boundaries of the post-Miocene stratigraphic units represent a progressive onlap termination against the apices of anticlinal folding (Fig. 13; Kwon, 2005; Kwon et al., 2009).

The southern region of the east coast may have also experienced considerable vertical displacement and deformation reflecting tectonic uplift during the Late Pleistocene along regional faults such as the Hupo, Yangsan, and Ulsan faults (J.H. Choi et al., 2003, 2009; S.J. Choi et al., 2008). All of the differential uplift is interpreted to be the result of backarc closing under a compressional regime since the early Pliocene (5 Ma) (S.H. Yoon and Chough, 1995; Chough et al., 2000). Although not all of the cross-coast faults along the east coast have been documented, local vertical movement and deformation probably caused marine terraces to experience uplift at different rates (Figs. 14, 15). This suggests their elevations largely reflect differential tectonic uplift (e.g., J.H. Choi et al., 2003, 2009; S.J. Choi et al., 2008, 2016).

We estimated rates of tectonic uplift of the marine terraces along the east coast of the Korean Peninsula using Eq. (12) and the five shoreline angle elevations listed in Table 2.

$$\text{Uplift Rates (m/ka)} = \frac{(\text{Elevation of SA} - \text{MHHW} - \text{Assumed LIG Sea Level})}{\text{Age}} \quad (12)$$

where SA represents the elevation of the shoreline angles and MHHW represents the mean higher high water at the subsites. The ages of the deposits associated with each of the SA can be found in Table 4. From Eq. 12, we arrive at uplift rates of  $0.189 \pm 0.031$  m/ka,  $0.195 \pm 0.037$  m/ka,  $0.251 \pm 0.024$  m/ka,  $0.172 \pm 0.024$  m/ka, and  $0.198 \pm 0.024$  m/ka for Gangneung-Anin, Donghae-Eodal-dong, Pohang-Yonghan-2, Pohang-Masan-ri, and Gyeongju-Jinri, respectively, if assuming a LIG RSL of +3 m for the Korean Peninsula, and  $0.166 \pm 0.030$  m/ka,  $0.171 \pm 0.035$  m/ka,  $0.228 \pm 0.022$  m/ka,  $0.146 \pm 0.023$  m/ka,  $0.174 \pm 0.022$  m/ka, respectively, in the case of a +6 m LIG RSL for the Korean Peninsula (Table 4). The error ranges were calculated

based on both the range of SA elevations and the age uncertainty (Table 4). The uplift rates for the northern and southern regions of the east coast are sufficiently different as to suggest differential uplift across the region (Table 4; Fig. 2).

580 **Table 4. Uplift rates based on the elevation of the shoreline angles listed in Table 2 and LIG RSLs of +3 m and +6 m, respectively, along the east coast of the Korean Peninsula.**

| Site      | Subsite    | Sample latitude (°) | Sample longitude (°) | Shoreline angle elevation (m) | ± Error range (ka) | Mean higher high water (MHHW) (m) | WALIS LUM ID | Age (ka) | ± Age uncertainty (ka) | In case of LIG RSL |                               | In case of LIG RSL |                               |
|-----------|------------|---------------------|----------------------|-------------------------------|--------------------|-----------------------------------|--------------|----------|------------------------|--------------------|-------------------------------|--------------------|-------------------------------|
|           |            |                     |                      |                               |                    |                                   |              |          |                        | +3 m               |                               | +6 m               |                               |
|           |            |                     |                      |                               |                    |                                   |              |          |                        | Uplift rate (m/ka) | ± Error of uplift rate (m/ka) | Uplift rate (m/ka) | ± Error of uplift rate (m/ka) |
| Gangneung | Anin       | 37.7401             | 128.9716             | 27.5                          | 2.5                | 0.09                              | 436          | 129.0    | 8.0                    | 0.189              | 0.031                         | 0.166              | 0.030                         |
| Donghae   | Eodal-dong | 37.5657             | 129.1181             | 28                            | 2                  | 0.07                              | 438          | 128.0    | 14.0                   | 0.195              | 0.037                         | 0.171              | 0.035                         |
| Pohang    | Yonghan-2  | 36.1085             | 129.4230             | 35                            | 0                  | 0.09                              | 450          | 127.0    | 12.0                   | 0.251              | 0.024                         | 0.228              | 0.022                         |
| Pohang    | Masan-ri   | 36.0152             | 129.4826             | 23.5                          | 1.5                | 0.09                              | 451          | 119.0    | 8.0                    | 0.172              | 0.024                         | 0.146              | 0.023                         |
| Gyeongju  | Jinri      | 35.6827             | 129.4686             | 28                            | 1                  | 0.05                              | 457          | 126.0    | 10.0                   | 0.198              | 0.024                         | 0.174              | 0.022                         |

## 5.2 Subsidence

The currently-dated LIG sites along the west coast of Korea are all subject to **potential** subsidence rather than tectonic uplift. LIG deposits are found at lower elevations with greater water depth but these likely reflect deposition in progressively deeper waters **during either the preceding rise in sea levels (MIS 6) or the fall in sea levels following the LIG highstand** (Figs 1, 11). LIG deposits appear to be better preserved basinward (Fig. 15). This preservation may be a result of erosion of the higher LIG deposits during subsequent sea-level falls (e.g., MIS 5d – MIS 2). Preservation of the deeper LIG deposits may have also been aided by their tectonic setting with increasing subsidence basinward. However, constraining the magnitude of Quaternary subsidence independent of the LIG elevation has yet to be attempted. Regional tectonic studies independent of the LIG shoreline elevation are needed to determine subsidence rates and correct LIG sea levels from its influence.

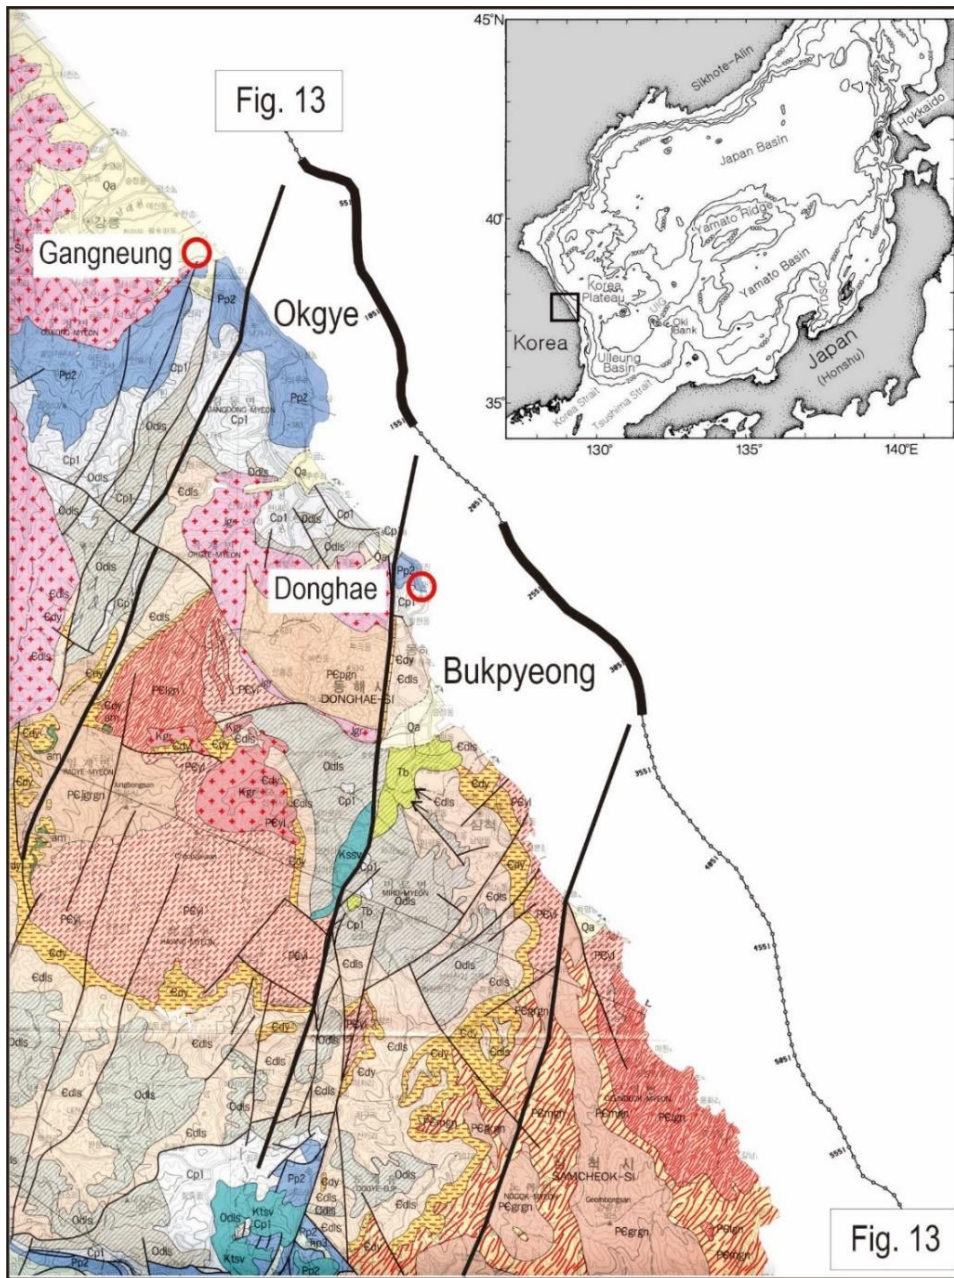

595 Figure 12: Geological map (1:250,000) and seismic track line around the Gangneung and Donghae areas (modified after J.C. Kim  
 et al., 2005; Ryang et al., 2007, 2014). The multichannel seismic profile with interpretation is shown in Fig. 12. Red circles indicate  
 the locations of LIG ages in Fig. 2. Solid lines indicate major strike-slip or thrust faults. Two thicker parts of the track line represent  
 the interval of thick sedimentary bodies in the seismic profile of Fig. 12. Inset shows this figure area (solid rectangle) and adjacent  
 land and sea (Chough et al., 2000). Legend codes of the geologic map (J.C. Kim et al., 2005): Qa, Quaternary Alluvium; Tb, Tertiary  
 Bukpyeong Group; Kgr, Cretaceous granite; Ksv, Ktsv, Cretaceous Kyeongsang Supergroup; Jgr, Jurassic granite; Pp2, Permian  
 600 Middle Pyeongan Group; Cp1, Carboniferous Lower Pyeongan Group; Ods, Ordovician Upper Great Limestone Group; edls,  
 Cambrian Lower Great Limestone Group; cdy, Cambrian Yangduk Group; Pejgrgn, Pcgrgn, Pelgn, Pcmgn, Peyl, Precambrian  
 Metamorphic Complex.

### Multichannel Seismic Profile

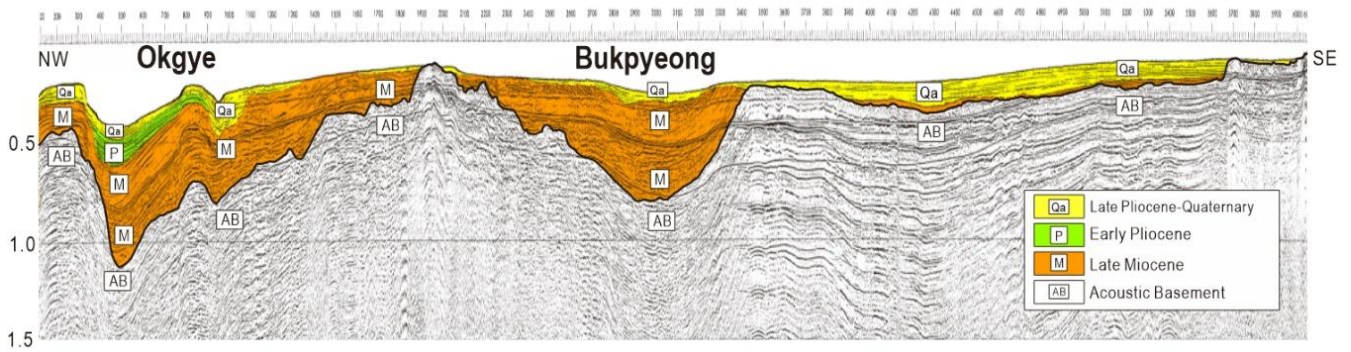

605 **Figure 13:** Seismic section obtained parallel to the coastline and its stratigraphic interpretation (modified after Kwon, 2005; Ryang et al., 2007, 2014). For the location of the seismic track line, see Fig. 12.

### Shoreline Angle Elevations along the East Coast

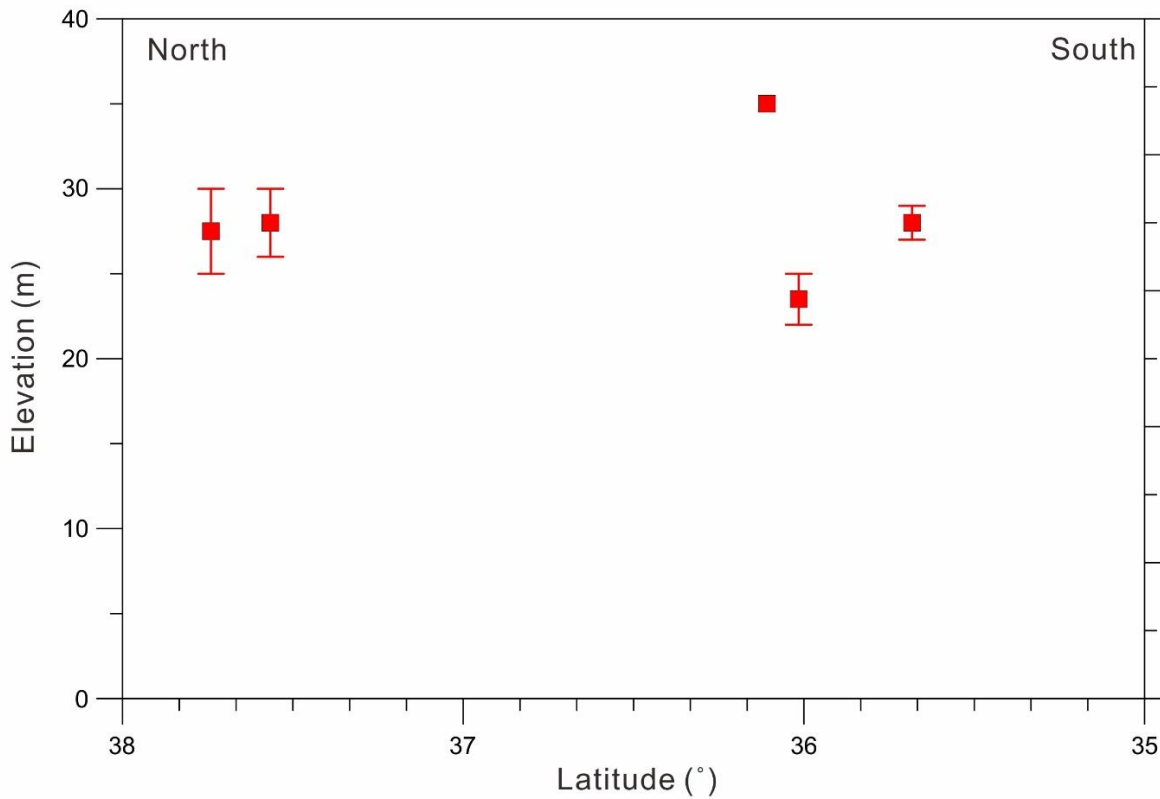

**Figure 14:** LIG relative sea level of the shoreline angles with respect to latitude along the east coast of Korea. See Table 2 to more details.

## LIG Relative Sea Level of Data Points

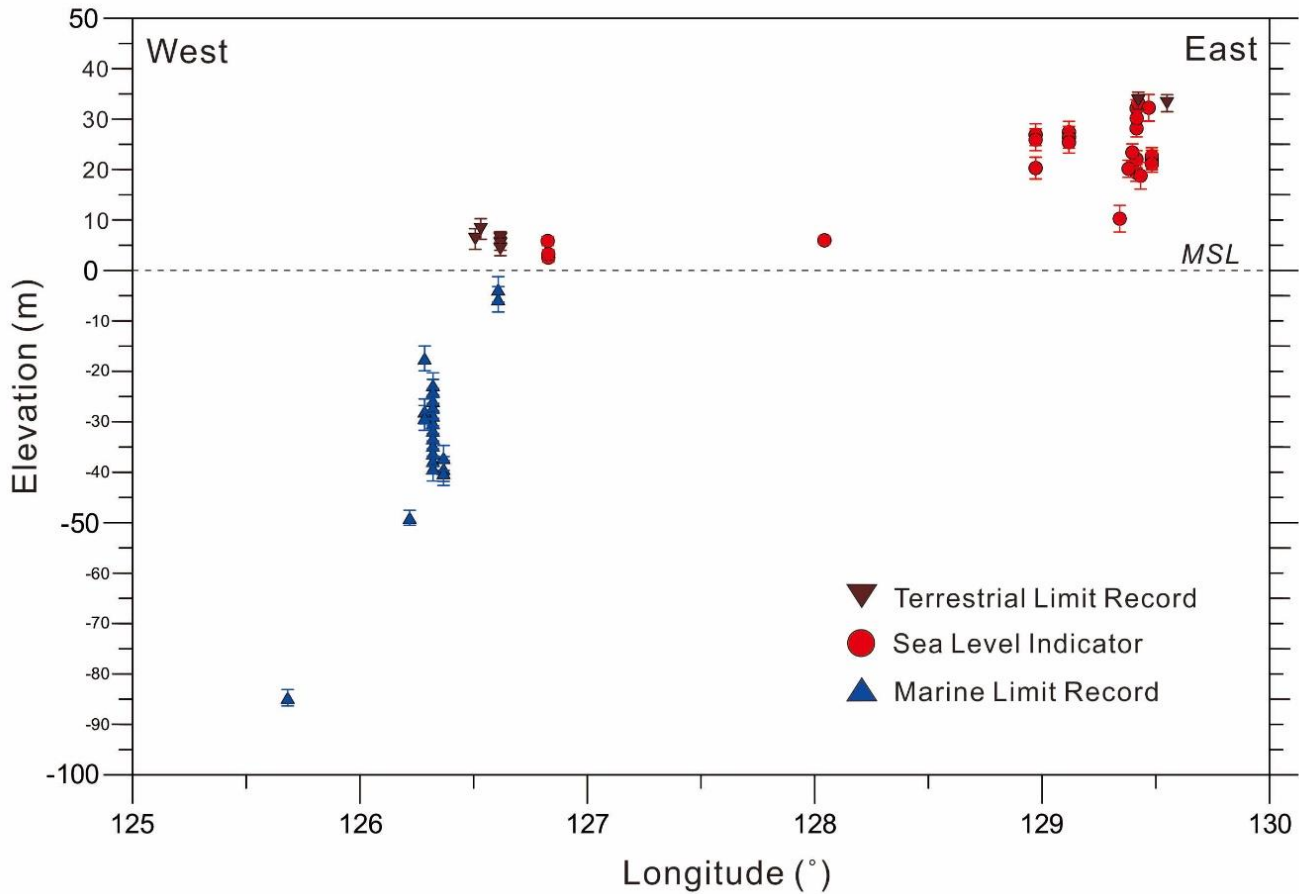

610

Figure 15. LIG relative sea levels with respect to longitude across the Korean Peninsula. See Table 3 for more details.

### 5.3 LIG sea-level fluctuations

Most ages of the LIG features in the Korean Peninsula were obtained via OSL. The error range of the OSL method is too large for the confident identification of fine-scale oscillations in LIG sea levels. The relatively few occurrences of LIG deposits also

615

### 5.4 Earlier highstands

Four IRSL ages ranging from 185 to 221 ka were obtained from paleo-beach deposits on marine terraces of earlier highstands at 59 to 63 m above MSL in the Gangneung area of the east Korean coast (Fig. 2; S.C. Hong, 2014). In this area, three ages between 211 and 253 ka were also dated by cosmogenic  $^{10}\text{Be}$  dating of paleo-beach deposits on marine terraces at 61 to 66 m

620

above MSL (S.Y. Lee et al., 2015). More work is needed to better document earlier sea-level highstands on the Korean Peninsula.



## 5.5 Holocene sea-level indicators

Representative Holocene sea-level curves are well constrained along the west coast of the Korean Peninsula based on intertidal features and other sea-level indicators (Bloom and Park, 1985; Y.H. Kim et al., 1999; Chang and Choi, 2001; Chough et al., 2004; E. Lee and Chang, 2015). However, the curves are limited by the absence of preserved tidal deposits as well as sparse ages on tidal-flat sea-level indicators from 6500 to 3000 yrs ago, dissimilar to those of the Yangtze delta plain in China (Chough et al., 2004; S.J. Choi, 2018; H.H. Yoon et al., 2021). K.H. Choi (2009) suggested the possibility of a sea-level highstand around 6000 yrs ago based on OSL-dated onland sand dune deposition, but he also noted the absence of age data covering the period between 5000 and 3500 yrs ago in his study. Another suggestion is the possibility of a higher-than-present mid-Holocene highstand based on palynological data on land (Hwang and Yoon, 2011; Song et al., 2018), but these deposits lack a proper sedimentological description and stratigraphic framework. Further work remains to be done in reconstructing mid-Holocene sea levels along the Korean Peninsula.

## 5.6 Uncertainty and data quality

As all the summarized age data are based on OSL, with the exception of a single paleomagnetic age, the ages of the LIG shoreline features in the Korean Peninsula are only accurate and precise enough to establish a MIS 5 age, not necessarily which interstadial the features were deposited during. The age uncertainty is partially controlled by the mineral dated, either quartz or K-feldspar, as well as assumptions related to complete bleaching of the grains and their water content through time. The average error of the 42 OSL measurements using quartz minerals is 9.7 ka, and that of the 10 OSL measurements on K-feldspar minerals is 20.7 ka. The large age uncertainty in dating K-feldspar minerals is more than double that of dating quartz. This range of 9.7 to 20.7 ka is thought to be far too large to determine exactly within MIS 5 the deposits formed. However, based on their stratigraphic occurrences as the highest deposits from the region, we interpret most of the OSL-dated deposits as MIS 5e in age. Although the basement massif in the west coast of Korea has been assumed to be stable or undergoing minor subsidence during the Quaternary (Chough et al., 2010), the uncertainty in LIG sea levels is probably not free of additional error from possible subsidence or uplift around the Korean Peninsula.

## 6 Concluding remarks

The LIG shoreline is well developed as a marine terrace along the east coast of the Korean Peninsula and MIS 5 deposits are prevalent within the onshore and nearshore west coast. The east coast contains prevalent beach deposits on many marine terraces along the peninsula. The east coast LIG deposits suggest RSLs between +9 and +32 m (Table 3; Fig. 15). However, the uplifted terraces upon which these ages were obtained are likely influenced by faulting under a compressional regime as a result of backarc closing of the East Sea (Table 2; Fig. 14). As a result, tectonic uplift likely biases the elevation of the east coast LIG shorelines. On the contrary, LIG sea levels appear to be well constrained to between +3 and +6 m by marine limiting records, sea-level indicators, and terrestrial limiting records along the west coast of the Korean Peninsula (Table 3; Fig. 15);

the most stable side of the Peninsula, although minor subsidence of the western coast cannot be ruled out. Further work is needed to establish credible sea-level indicators within the onshore portions of the west coast of the Korean Peninsula.

## 655 **7 Data availability**

The Korean Peninsula Last Interglacial sea-level database is available open access, and updated as necessary, at the following link: <https://doi.org/10.5281/zenodo.4974826>. The files at this link were exported from the WALIS database interface on June 17, 2021. A description of each field in the database can be found at this link: <https://doi.org/10.5281/zenodo.3961543> (Rovere et al., 2020) and is accessible and searchable here: <https://walis-help.readthedocs.io/en/latest/>. More information on the World  
660 Atlas of Last Interglacial Shorelines can be found here: <https://warmcoasts.eu/world-atlas.html>.

## **Author contributions**

WHR read the papers for the data, compiled the data, and wrote the initial manuscript. ARS **initiated** this work and revised the manuscript and dataset. HHY wrote the section of core DSR-C03 and drew most of the modified and original figures in this paper. Further input and discussion on the data and manuscript were provided by SSC and GSK. All authors revised the final  
665 text and agree with its contents.

## **Acknowledgments**

This research was supported by research funds of Jeonbuk National University in 2020 and the National Research Foundation of Korea (NRF) grant funded by the Korean government (MSIT) (NRF-2019R1F1A1057715). GSK was supported by the project of development of the integrated geophysical survey and real scale data processing technologies for 3D high-resolution  
670 imaging of the marine subsurface (21-3312-1) of KIGAM. We acknowledge that the core DSR-C03 kept in Marine Core Center of KIGAM was used. The data used in this study were compiled in WALIS, a sea-level database interface developed by the ERC Starting Grant "WARMCOASTS" (ERC-StG-802414), in collaboration with PALSEA (PAGES / INQUA) working group. The database structure was designed by A. Rovere, D. Ryan, T. Lorscheid, A. Dutton, P. Chutcharavan, D. Brill, N. Jankowski, D. Mueller, M. Bartz, E. Gowan, and K. Cohen.

## 675 **References**

Baek, Y. S., Lee, S. H., and Chang, T. S.: Last interglacial to Holocene sedimentation on intertidal to subtidal flats revealed by seismic and deep-core sediment analyses, southwest coast of Korea, *Quaternary International*, 459, 45-54, 2017.  
Bradley, W. C., and Griggs, G. B.: Form, genesis, and deformation of central California wave-cut platforms, *Geological Society of America Bulletin*, 87, 433-449, 1976.

- 680 Bloom, A. L. and Park, Y. A.: Holocene sea-level history and tectonic movements, Republic of Korea, *The Quaternary Research*, 24, 77-84, 1985.
- Chang, J. H. and Choi, J. Y.: Tidal-flat sequence controlled by Holocene sea-level rise in Gomso Bay, west coast of Korea, *Estuarine, Coastal and Shelf Science*, 52, 391-399, 2001.
- Chang, T. S. and Ha, H. J.: The Heuksan mud belt on the tide-dominated shelf of Korea: a supply-driven depositional system?  
685 *Geo-Marine Letters*, 35, 447-460, 2015.
- Chang, T. S., Kim, J. C., and Yi, S.: Discovery of Eemian marine deposits along the Baeksu tidal shore, southwest coast of Korea, *Quaternary International*, 349, 409-418, 2014.
- Chang, T. S., Hong, S. H., Chun, S. S., and Choi, J. H.: Age and morphodynamics of a sandy beach fronted by a macrotidal mud flat along the west coast of Korea: a lateral headland bypass model for beach-dune formation, *Geo-Marine Letters*,  
690 37, 361-371, 2017.
- Choi, J. H.: Luminescence ages of quaternary marine sediments on the eastern coast of Korea and their geomorphic implications, Ph.D. thesis, Seoul National University, Republic of Korea, 137 pp., 2004.
- Choi, J. H., Murray, A. S., Cheong, C. S., Hong, D. G., and Chang, H. W.: The resolution of stratigraphic inconsistency in the luminescence ages of marine terrace sediments from Korea, *Quaternary Science Reviews*, 22, 1201-1206, 2003.
- 695 Choi, J. H., Cheong, C. S., and Chang, H. W., 2004, Principles of quartz OSL (Optically Stimulated Luminescence) dating and its applications, *Journal of the Geological Society of Korea*, 40, 567-583, 2004 (in Korean with English abstract)
- Choi, J. H., Kim, J. W., Murray, A. S., Hong, D. G., Chang, H. W., and Cheong, C. S.: OSL dating of marine terrace sediments on the southeastern coast of Korea with implications for Quaternary tectonics, *Quaternary International*, 199, 3-14, 2009.
- Choi, K. and Kim, S. P.: Late Quaternary evolution of macrotidal Kimpo tidal flat, Kyonggi Bay, west coast of Korea, *Marine Geology*, 232, 17-34, 2006.  
700
- Choi, K. H.: Evolution of Coastal Dune System and Sea Level Change during Holocene in Korea, Ph.D. thesis, Seoul National University, Republic of Korea, 192 pp., 2009. (in Korean with English abstract)
- Choi, K. H., Chang, T. S., Choi, J. H., Kim, Y. M., and Lee, S. Y.: Burial storm deposits recorded at the coastal dunes, Dasari, Chungnam Province, *Journal of the Geological Society of Korea*, 50, 539-549, 2014. (in Korean with English abstract)
- 705 Choi, S. G.: The last interglacial sea levels estimated from the morphostratigraphic comparison of the Late Pleistocene fluvial terraces in the eastern coast of Korea, *The Korean Journal of Quaternary Research*, 7, 1-26, 1993. (in Korean with English abstract)
- Choi, S. G.: Last interglacial marine geomorphic surfaces between Gangneung to Muckho in mid-eastern coast of Korean Peninsula, *Journal of the Korean Geomorphological Association*, 2, 9-20, 1995a. (in Korean with English abstract)
- 710 Choi, S. G.: The comparison and chronology of the lower marine terraces in the mid-eastern coast of Korean Peninsula, *Journal of the Korean Geographical Society*, 30, 103-119, 1995b. (in Korean with English abstract)
- Choi, S. G.: Chronological study of Late Pleistocene marine terraces around Pohang area, southeastern coast of Korea, *Journal of the Korean Geomorphological Association*, 3, 29-44, 1996. (in Korean with English abstract)



- 715 Choi, S. G.: Tectonic movement in the southwestern coast of the Korean Peninsula indicated by marine terraces of Soando Island, *Journal of the Korean Geomorphological Association*, 13, 1-10, 2006. (in Korean with English abstract)
- Choi, S. G.: The estimation of the marine terrace of the Last interglacial culmination stage (MIS 5e) in the Sanhari of Ulsan coast, southeastern Korea, *Journal of the Korean Geomorphological Association*, 23, 47-59, 2016a. (in Korean with English abstract)
- 720 Choi, S. G.: The estimation of the marine terrace of the late warm period of the Last Interglacial in the Sajin coast of Yeongdeok, southeastern coast of Korea, *Journal of the Association of Korean Geographers*, 5, 281-287, 2016b. (in Korean with English abstract)
- Choi, S. G. and Chang, H.: Correlation and chronology of the marine terraces and thalassostatic terraces in the Yeongdeok coast, south eastern Korean Peninsula, *Journal of the Korean Geomorphological Association*, 26, 81-96, 2019. (in Korean with English abstract)
- 725 Choi, S. G., Tamura, T., Miyauchi, T., and Tsukamoto, S.: The examination of the limitations of using the OSL dates derived from this study in the correlation of MIS 5 marine terraces distributed in the southeastern coast of the Korean Peninsula, *Journal of the Korean Geomorphological Association*, 25, 63-75, 2018. (in Korean with English abstract)
- Choi, S. J.: Marine terrace of the Jinha-Ilgwang area, southeast Korea, *Economic and Environmental Geology*, 36, 233-242, 2003. (in Korean with English abstract)
- 730 Choi, S. J.: Marine terraces and Quaternary faults in the Homigot and the Guryongpo, SE Korea, *Journal of the Petrological Society of Korea*, 25, 231-240, 2016. (in Korean with English abstract)
- Choi, S. J.: Review on the relative sea-level changes in the Yellow Sea during the Late Holocene, *Economic and Environmental Geology*, 51, 463-471, 2018. (in Korean with English abstract)
- 735 Choi, S. J.: Review on marine terraces of the East Sea coast, South Korea: Gangreung – Busan, *Economic and Environmental Geology*, 52, 409-425, 2019. (in Korean with English abstract)
- Choi, S. J., Merritts, D. J., and Ota, Y.: Elevations and ages of marine terraces and late Quaternary rock uplift in southeastern Korea, *Journal of Geophysical Research: Solid Earth*, 113, 1-15, 2008.
- Chough, S. K.: *Geology and Sedimentary of the Korean Peninsula*, London, Elsevier, 1-363, 2013.
- Chough, S. K., Lee, H. J., and Yoon, S. H.: *Marine Geology of Korean Seas*, Elsevier, Amsterdam, 1-313, 2000.
- 740 Chough, S. K., Lee, H. J., Chun, S. S., and Shinn, Y. J.: Depositional processes of late Quaternary sediments in the Yellow Sea: a review: *Geosciences Journal*, 8, 211-264, 2004.
- Chun, S. S., Hwang, I. G., Ryang, W. H., Chang, T. S., Kim, J. G., and Yoon, H. H.: *Western Pacific Sedimentology Meeting (WPSM) Field Trip Guide Book, Sedimentology of Holocene Tidal Flats (open coast & archipelago) and Cretaceous Nonmarine (strike-slip) Basin: Gwangju, Korean Sedimentology Research Group (KSRG)*, 1-117, 2018.
- 745 Creveling, J. R., Mitrovica, J. X., Clark, P. U., Waelbroeck, C., and Pico, T.: Predicted bounds on peak global mean sea level during marine isotope stages 5a and 5c, *Quaternary Science Reviews*, 193-208, 2017.

- Cummings, D. I., Dalrymple, R. W., Choi, K., and Jin, J. H.: The Tide-dominated Han River Delta, Korea, Elsevier, Amsterdam, 1-376, 2016.
- 750 Dalrymple, R.W.: Tidal depositional systems, in: Facies Models 4, edited by: James, N.P. and Dalrymple, R.W., St. John's, Geological Association of Canada, 201-231, 2010.
- Dalrymple, R. W., Zaitlin, B. A., and Boyd, R.: Estuarine facies models: conceptual basis and stratigraphic implications, *Journal of Sedimentary Research*, 62, 1130-1146, 1992.
- Dutton, A. and Lambeck, K.: Ice volume and sea level during the last interglacial, *Science*, 337, 216-219, 2012.
- 755 Hong, S. C.: Constraining the Depositional Age of Marine Terrace Sediments along the Eastern Coast of Korea using Optical Dating, Ph.D. thesis, Seoul National University, Republic of Korea, 160 pp., 2014. (in Korean with English abstract)
- Hong, S. C.: Principle and geomorphological application of rock surface luminescence dating, *Journal of the Korean Geomorphological Association*, 23, 127-136, 2016. (in Korean with English abstract)
- Hong, S. C., Choi, J. H., Yeo, E. Y., and Kim, J. W.: Principles of K-Feldspar IRSL (InfraRed stimulated luminescence) dating and its applications, *Journal of the Geological Society of Korea*, 49, 305-324, 2013 (in Korean with English abstract)
- 760 Hong, S. H., Chang, T. S., Lee, G. S., Kim, J. C., Choi, J., and Yoo, D. G.: Late Pleistocene-Holocene sedimentary facies and evolution of the Jeju Strait shelf, southwest Korea, *Quaternary International*, 519, 156-169, 2019.
- Hwang, S. I. and Yoon, S. O.: The characteristics of sedimentary facies and the geomorphological development of marine terraces in Kumgok area, Youngdeok county, east coast of Korea, *Journal of the Korean Geomorphological Association*, 3, 99-114, 1996. (in Korean with English abstract)
- 765 Hwang, S. I. and Yoon, S. O.: Holocene climatic characteristics in Korean Peninsula with the special reference to sea level changes, *Journal of the Korean Geomorphological Association*, 18, 235-246, 2011. (in Korean with English abstract)
- Hwang, S. I. and Yoon, S. O.: The geomorphological development of marine terraces UHS (upper higher surface) and HHS (high higher surface) around Yeondae-san, Gampo-Eup, southeastern coast of Korea, *Journal of the Korean Geomorphological Association*, 27, 13-28, 2020. (in Korean with English abstract)
- 770 Hwang, S. I., Shin, J. Y., and Yoon, S. O.: Marine terrace and its implications to paleoenvironment during the Quaternary at Suje-ri – Suryum-ri of the east coast of Gyeongju, SE Korea, *Journal of the Korean Geomorphological Association*, 19, 97-108, 2012. (in Korean with English abstract)
- Ingle, J. C. Jr.: Subsidence of the Japan Sea: stratigraphic evidence from ODP sites and onshore sections, *Proceedings of the Ocean Drilling Program: Scientific Results 127/128 (part 2)*, College Station, TX, 1197-1218, 1992.
- 775 Inoue, D., Sasai, T., Yanagida, M., Choi, W. H., and Chang, C. J.: Stratigraphy of the marine terrace along the east coast in Korea by means of the loess-paleosol sequence and Japanese tephra, in: Abstract of the 2002 Autumn Conference of the Geological Society of Korea, 24-26 October 2002, 81, 2002.
- Jin, J. H., Chough, S. K., and Ryang, W. H.: Sequence aggradation and systems tracts partitioning in the mid-eastern Yellow Sea: roles of glacio-eustasy, subsidence and tidal dynamics, *Marine Geology*, 184, 249-271, 2002.
- 780 Klein, G. D.: Intertidal flats and intertidal sand bodies, *Coastal Sedimentary Environments*, Springer, 187-224, 1985.

- Kim, Jeong C., Ko, H. J., Lee, S. R., Lee, C. B., Choi, S. J., and Park, K. W.: 1:250,000 Geological Report of the Gangneung-Sokcho Sheets, Daejeon, Korea Institute of Geoscience and Mineral Resources, 76 pp., 2001. (in Korean with English abstract)
- 785 Kim, Jin C., Chang, T. S., and Yi, S.: OSL chronology of the Huksan Mud Belt, south-eastern Yellow Sea, and its paleoenvironmental implications, *Quaternary International*, 503, 170-177, 2019.
- Kim, J. W., Chang, H. W., Choi, J. H., Choi, K. H., and Byun, J. M.: The morphological characteristics and geochronological ages of coastal terraces of Heunghae region in northern Pohang City, Korea, *Journal of the Korean Geomorphological Association*, 12, 103-116, 2005a. (in Korean with English abstract)
- 790 Kim, J. W., Chang, H. W., Choi, K. H., and Lee, J.: Geomorphic and Geochronologic Survey of Coastal Terraces on the East Coast of Korean Peninsula, Korea Hydro and Nuclear Power Co., Res. Rep. E03NJ07, unpublished, 1-196, 2005b. (in Korean)
- Kim, J. W., Chang, H. W., Choi, J. H., Choi, K. H., and Byun, J. M.: Landform characteristics of coastal terraces and optically stimulated luminescence dating on the terrace deposits in Yangnam and Yangbuk area of the Gyeongju City, South Korea, *Journal of the Korean Geomorphological Association*, 14, 1-14, 2007a. (in Korean with English abstract)
- 795 Kim, J. W., Chang, H. W., Choi, J. H., Choi, K. H., and Byun, J. M.: Optically stimulated luminescence dating on the marine terrace deposits of Hujeong-Jukbyeon region in Uljin, Korea, *Journal of the Korean Geomorphological Association*, 14, 15-27, 2007b. (in Korean with English abstract)
- Kim, S. W.: A study on the terraces along the southeastern coast (Bang-eojin-Pohang) of the Korean Peninsula, *Journal of Geological Society of Korea*, 9, 89-121, 1973.
- 800 Kim, Y. H., Lee, H. J., Chun, S. S., Han, S. J., and Chough, S. K.: Holocene transgressive stratigraphy of a macrotidal flat in the southeastern Yellow Sea: Gomso Bay, Korea, *Journal of Sedimentary Research*, 69, 328-337, 1999.
- Kopp, R. E., Simons, F. J., Mitrovica, J. X., Maloof, A. C., Oppenheimer, M.: Probabilistic assessment of sea level during the last interglacial stage, *Nature*, 462, 863-867, 2009.
- 805 Korea Hydrographic and Oceanographic Agency (KHOA), Ocean Data in Grid Framework, [www.khoa.go.kr/oceangrid/gis/category/reference/distribution.do](http://www.khoa.go.kr/oceangrid/gis/category/reference/distribution.do), last access: 16 June 2021. (in Korean)
- Kwon, Y. K.: Sequence Stratigraphy of the Taebaek Group (Cambrian-Ordovician), Mideast Korea and Seismic Stratigraphy of the Western South Korea Plateau, East Sea, Ph.D. thesis, Seoul National University, Republic of Korea, 205 pp., 2005.
- Kwon, Y. K., Yoon, S. H., and Chough, S. K.: Seismic stratigraphy of the western South Korea Plateau, East Sea: implications for tectonic history and sequence development during back-arc evolution, *Geo-Marine Letters*, 29, 181-189, 2009.
- 810 Lee, D. Y.: Stratigraphic research of the Quaternary deposits in the Korean Peninsula, *The Korean Journal of Quaternary Research*, 1, 3-20, 1987.
- Lee, E. and Chang, T. S.: Holocene sea level changes in the eastern Yellow Sea: a brief review using proxy records and measurement data, *Journal of the Korean Earth Science Society*, 36, 520-532, 2015. (in Korean with English abstract)

- 815 Lee, G. R. and Park, C. S.: Properties of deposits and geomorphic formative ages on marine terraces in Gwangyang Bay, South Sea of Korea, *Journal of the Korean Geographical Society*, 3, 346-360, 2006. (in Korean with English abstract)
- Lee, G. R. and Park, C. S.: Study on Development and Distributional Characteristics of Terrace in the West and South Coast of Korea, Kyungpook National University and Korea Institute of Geoscience and Mineral Resources, unpublished, 1-111, 2018. (in Korean with English abstract)
- 820 Lee, G. R. and Park, C. S.: Comparison of uplift rate in the southern coast of the Korean Peninsula, *Journal of the Korean Geomorphological Association*, 26, 55-67, 2019a. (in Korean with English abstract)
- Lee, G. R. and Park, C. S.: Production of Uplift Rate Map in the East Coast using Studies on Marine Terraces, Kyungpook National University and Korea Institute of Geoscience and Mineral Resources, unpublished, 1-106, 2019b. (in Korean with English abstract)
- 825 Lee, G. R. and Park, C. S.: Uplift rate map and distribution of uplift rate in the east coast of the Korean Peninsula, *Journal of the Korean Geomorphological Association*, 27, 47-60, 2020. (in Korean with English abstract)
- Lee, J. Y., Kim, J. C., Lim, J., Kota, K., Hong, S. S., Moon, J. A., and Kim, Y. E.: Depositional environments and ages of coastal deposits in Gwanpo-ri, Geoje Island, *Journal of the Geological Society of Korea*, 49, 661-667, 2013. (in Korean with English abstract)
- 830 Lee, S. Y., Seong, Y. B., Kang, H. C., Choi, K. H., and Yu, B. Y.: Cosmogenic  $^{10}\text{Be}$  and OSL dating of marine terraces along the central-east coast of Korea: spatio-temporal variations in uplift rates, *The Open Geography Journal*, 7, 28-39, 2015.
- Li, C., Chen, G., Yao, M., and Wang, P.: The influences of suspended-load on the sedimentation in the coastal zones and continental shelves of China, *Marine Geology*, 96, 341-352, 1991.
- Li, X. S., Zhao, Y. X., Feng, Z. B., Liu, C. G., Xie, Q. H., and Zhou, Q. J.: Quaternary seismic facies of the South Yellow Sea shelf: depositional processes influenced by sea-level change and tectonic controls, *Geological Journal*, 51, 77-95, 2016.
- 835 Lim, D. I., Jung, H.S., Kim, B.O., Choi, J.Y., and Kim, H.N.: A buried palaeosol and late Pleistocene unconformity in coastal deposits of the eastern Yellow Sea, East Asia, *Quaternary International*, 121, 109-118, 2004.
- Marsset, T., Xia, D., Berne, S., Liu, Z., Bourillet, J. F., and Wang, K.: Stratigraphy and sedimentary environments during the Late Quaternary in the Eastern Bohai Sea (North China Platform), *Marine Geology*, 135, 97-114, 1996.
- 840 Mauz, B. and Bungenstock, F.: How to reconstruct trends of late Holocene relative sea level: A new approach using tidal flat clastic sediments and optical dating, *Marine Geology*, 237, 225-237, 2007.
- Mauz, B., Vacchi, M., Green, A., Hoffmann, G., and Cooper, A.: Beachrock: a tool for reconstructing relative sea level in the far-field, *Marine Geology*, 362, 1-16, 2015.
- Mayer, R. H. and Kriebel, D. L.: Wave runup on composite-slope and concave beaches, in: *Proceedings of the 24th Coastal Engineering Conference*, ASCE, 2325-2339, 1994.
- 845 Molnar, P. and Tapponnier, P.: Cenozoic tectonics of Asia - effects of a continental collision, *Science*, 189, 419-426, 1975.

- Muhs, D. R., Kelsey, H. M., Miller, G. H., Kennedy, G. L., Whelan, J. F., and McInelly, G. W.: Age estimates and uplift rates for late Pleistocene marine terraces: Southern Oregon portion of the Cascadia forearc, *Journal of Geophysical Research*, 95, 6685-6698, 1990.
- 850 Murray, A. S., and Wintle, A. G.: Luminescence dating of quartz using an improved single-aliquot regenerative-dose protocol, *Radiation Measurements*, 32, 57-73, 2000.
- Nam, S. H., Lyu, S. J., Kim, Y. H., and Kim, K.: Correction of TOPEX/POSEIDON altimeter data for nonisostatic sea level response to atmospheric pressure in the Japan/East Sea, *Geophysical Research Letters*, 31, L02304, 2004.
- Nam, S. H., Park, J. H., and Park, J. J.: High-frequency variability: Basin-scale oscillations and internal waves/tides, in: *Oceanography of the East Sea (Japan Sea)*, edited by: Chang, K.I., Zhang, C.I., Park, C., Kang, D.J., Ju, S.J., Lee, S.H., and Wimbush, M., Springer, Cham, 127-148, 2015.
- 855 National Geographic Information Institute: Korean Official Vertical Datum since 1964, <https://www.ngii.go.kr/eng/content.do?sq=110>, last access: 16 June 2021.
- Oh, G. H.: The geomorphic history of the southeastern coast of the Korean Peninsula, *Geographical Review of Japan*, 50, 689-699, 1977. (In Japanese with English abstract)
- 860 Oh, J. S.: Discussion on the characteristics and formation age of the reddish-yellow semi-consolidation deposits, west coast of Korea: comparison with the Ujeon coast deposits in Jeungdo, *Journal of the Association of Korean Geographers*, 7, 55-68, 2018. (in Korean with English abstract)
- Oh, I. S., and Lee, D. E.: Tides and tidal currents of the Yellow and East China Seas during the last 13000 years, *Journal of the Korean Society of Oceanography*, 33, 37-145, 1998.
- 865 Otvos, E.G.: Beach ridges – definitions and significance, *Geomorphology*, 32, 83-108, 2000.
- Park, C. S., Kihm, Y. H., Nahm, W. H., and Lee, G. R.: Formative age of coastal terraces and uplift rate in the east coast of South Korea, *Journal of the Korean Geomorphological Association*, 24, 43-55, 2017. (in Korean with English abstract)
- Park, Y. A., Lim, D. I., Khim, B. K., Choi, J. Y., and Doh, S. J.: Stratigraphy and subaerial exposure of late Quaternary tidal deposits in Haenam Bay, Korea (south-eastern Yellow Sea): *Estuarine, Coastal and Shelf Science*, 47, 523-533, 1998.
- 870 Pugh, D. and Woodworth, P.: *Sea-Level Science: Understanding Tides, Surges, Tsunamis and Mean Sea Level*, Cambridge University Press, Cambridge, 1-395, 2014.
- Ren, J., Tamaki, K., Li, S., and Junxia, Z.: Late Mesozoic and Cenozoic rifting and its dynamic setting in Eastern China and adjacent areas, *Tectonophysics*, 344, 175-205, 2002.
- Rhodes, E. J.: Optically stimulated luminescence dating of sediments over the past 200,000 years, *Annual Review of Earth and Planetary Sciences*, 39, 461-488, 2011.
- 875 Rovere, A., Raymo, M. E., Vacchi, M., Lorscheid, T., Stocchi, P., Gomez-Pujol, L., Harris, D. L., Casella, E., O'Leary, M. J., and Hearty, P. J.: The analysis of Last Interglacial (MIS 5e) relative sea-level indicators: Reconstructing sea-level in a warmer world, *Earth-Science Reviews*, 159, 404-427, 2016.

- Rovere, A., Ryan, D., Murray-Wallace, C., Simms, A., Vacchi, M., Dutton, A., Lorscheid, T., Chutcharavan, P., Brill, D., Batz, M., Jankowski, N., Mueller, D., Cohen, K., and Gowan, E.: Descriptions of database fields for the World Atlas of Last Interglacial Shorelines (WALIS), Zonodo, <https://doi.org/10.5281/zenodo.3961543>, last access: 16 June 2021.
- Ryang, W. H., Kwon, Y. K., Jin, J. H., Kim, H. T., and Lee, C. W.: Geoacoustic velocity of basement and Tertiary successions of the Okgye and Bukpyeong coast, East Sea, *Journal of the Korean Earth Sciences Society*, 28, 367-373, 2007. (in Korean with English abstract)
- 885 Ryang, W. H., Kwon, Y. K., Kim, S. P., Kim, D. C., and Choi, J. H.: Geoacoustic model at the DH-1 long-core site in the Korean continental margin of the East Sea, *Geosciences Journal*, 18, 269-279 2014.
- Ryang, W. H. and Simms, A. R.: Last interglacial sea-level proxies in the Korean Peninsula, <https://doi.org/10.5281/zenodo.4974826>, last access: 17 June 2021.
- Schellart, W. P. and Lister, G. S.: The role of the East Asian active margin in widespread extensional and strike-slip deformation in East Asia, *Journal of the Geological Society*, 162, 959-972, 2005.
- 890 Shennan, I., Long, A. J., Horton, B. P.: *Handbook of Sea-Level Research*, American Geophysical Union & Wiley, Chichester, 1-581, 2015.
- Shim, T. M.: *Paleomagnetic Studies on the Coastal Terrace Deposits along the Youngil Bay, Eastern Coast of the Korean Peninsula*, Ph.D. thesis, Yonsei University, Republic of Korea, 115 pp., 2006. (in Korean with English abstract)
- 895 Shin, J. Y. and Hong, S. C.: The formative processes and ages of paleo-coastal sediments in Daepo-dong Sacheon-si in the southern coast, South Korea: evaluation of the mode and rate of the late Quaternary tectonism (II), *Journal of the Korean Geomorphological Association*, 25, 57-70, 2018. (in Korean with English abstract)
- Shin, W. J., Yang, D. Y., and Kim, J. Y.: A study on the characteristics and burial age of sediment layers at Bukpyeong myeon, Haenam gun, *Journal of the Korean Geomorphological Association*, 23, 41-55, 2016. (in Korean with English abstract)
- 900 Shin, W. J., Lee, J. H., Byun, J., and Kim, J. Y.: The evidence for the high sea level of MIS 5e and the paleo-coastal sediments from Sinji-myeon, Wando-gun, Jeollanam-do, Korea, *Journal of the Korean Geomorphological Association*, 26, 59-78, 2019. (in Korean with English abstract)
- Shinn, Y. J., Chough, S. K., Kim, J. W., and Woo, J.: Development of depositional systems in the southeastern Yellow Sea during the postglacial transgression, *Marine Geology*, 239, 59-82, 2007.
- 905 Song, B., Yi, S., Yu, S. Y., Nahm, W. H., Lee, J. Y., Lim, J., Kim, J. C., Yang, Z., Han, M., and Jo, K. N.: Holocene relative sea-level changes inferred from multiple proxies on the west coast of South Korea, *Palaeogeography, Palaeoclimatology, Palaeoecology*, 496, 268-281, 2018.
- Tamaki, K., Suyehiro, K., Allan, J., Ingle J. C. Jr., and Pisciotto, K. A.: *Tectonic synthesis and implications of Japan Sea ODP drilling*, *Proceedings of the Ocean Drilling Program: Scientific Results 127/128 (part 2)*, College Station, TX, 1333-1348, 910 1992.
- Thompson, S. B. and Creveling, J. R.: A global database of Marine Isotope Stage 5a and 5c marine terraces and paleoshorelines indicators, *Earth System Science Data Discussions*, <https://doi.org/10.5194/essd-2021-14>, last access: 16 June 2021.

- US Army Corps of Engineers: Shore Protection Manual, Department of the Army, Waterways Experiment Station, Vicksburg, Chapter 2, 1-148, 1984.
- 915 Veeh, H.H.:  $\text{Th}^{230}/\text{U}^{238}$  and  $\text{U}^{234}/\text{U}^{238}$  ages of Pleistocene high sea level stand, *Journal of Geophysical Research*, 71, 3379-3386, 1966.
- Watson, M. P., Hayward, A. B., Parkinson, D. N., and Zhang, Z. M.: Plate Tectonic History, Basin Development and Petroleum Source Rock Deposition Onshore China, *Marine and Petroleum Geology*, 4, 205-225, 1987.
- 920 Yang, D. Y., Han, M., Kim, J. C., Lim, J., Yi, S., and Kim, J. Y. Characteristics of marine terrace sediments formed during the Marine Isotope Stage 5e in the west south coast of the Korean Peninsula, *Economic and Environmental Geology*, 49, 417-432, 2016. (in Korean with English abstract)
- Yang, J. H. Morphogenetic succession and coastal climatic terrace associated with Quaternary climatic change, southern coast in Korean Peninsula, *Journal of the Korean Geomorphological Association*, 15, 93-110, 2008. (in Korean with English abstract)
- 925 Yang, J. H. Holocene sea level reflected from marine terrace in Geoje Island and its influences on coastal morphogenesis, *Journal of the Korean Geomorphological Association*, 18, 101-112, 2011. (in Korean with English abstract)
- Yang, J. H., Kee, K. D., and Kim, Y. R.: Morpho-climatic milieu and morphogenetic succession of coastal terrace in Suncheon Bay, *Journal of the Korean Geomorphological Association*, 20, 57-74, 2013. (in Korean with English abstract)
- 930 Yoo, D. G., Lee, G. S., Kim, G. Y., Kang, N. K., Yi, B. Y., Kim, Y. J., Chun, J. H., and Kong, G. S.: Seismic stratigraphy and depositional history of late Quaternary deposits in a tide-dominated setting: An example from the eastern Yellow Sea, *Marine and Petroleum Geology*, 73, 212-227, 2016.
- Yoon, H. H., Ryang, W. H., Chun, S. S., Simms, A. R., Kim, J. C., Chang, T. S., Yoo, D. G., and Hong, S. H.: Sensitive responses of coastal depositional system to the decreasing rates of Holocene sea-level rise in the macrotidal coast of Gochang, SW Korea, *Journal of Sedimentary Research*, in review, 2021.
- 935 Yoon, S. H. and Chough, S. K.: Regional strike-slip in the eastern continental margin of Korea and its tectonic implications for the evolution of Ulleung Basin, East Sea (Sea of Japan), *Geological Society of America Bulletin*, 107, 83-97, 1995.
- Yoon, S. O., Hwang, S. I., and Jung, H. K.: A geomorphological development of marine terraces around Najung-ri and Daebori at Gampo area, southeastern coast of Korea, *Journal of the Korean Geomorphological Association*, 6, 99-119, 1999. (in Korean with English abstract)
- 940 Yoon, S. O., Hwang, S. I., and Ban, H. K.: Geomorphic development of marine terraces at Jeongdongjin-Daejin area on the east coast, central part of Korean Peninsula, *Journal of the Korean Geographical Society*, 38, 156-172, 2003. (in Korean with English abstract)
- 945 Yoon, S. O., Kwak, M., and Hwang, S. I.: Geomorphic development of marine terraces around the Kangdong area, Ulsan metropolitan city, southeastern coast of Korea, *Journal of the Korean Geomorphological Association*, 21, 147-163, 2014. (in Korean with English abstract)



Yoon, S. O., Park, C. S., and Hwang, S. I.: Geomorphic development of marine terraces in the Nampo area, Boryeong-si, Chungnam Province, Journal of the Korean Geomorphological Association, 22, 75-87, 2015. (in Korean with English abstract)
